# Supplementary material for: Seasonal air concentration variability, gas–particle partitioning, precipitation scavenging, and air–water equilibrium of organophosphate esters in southern Canada
Source: Copernicus journal article supplement (doi:10.5194/acp-25-459-2025), 2025-01-15
Supplement: Supplementary file 1 [file acp-25-459-2025-supplement.pdf]

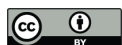

*Supplement of*

**Seasonal air concentration variability, gas–particle partitioning, precipitation scavenging, and air–water equilibrium of organophosphate esters in southern Canada**

**Yuening Li et al.**

*Correspondence to:* Frank Wania ([frank.wania@utoronto.ca](mailto:frank.wania@utoronto.ca))

The copyright of individual parts of the supplement might differ from the article licence.

## Content

|                   |                                                                                                                                                                                                                                                                                                                                                  |     |
|-------------------|--------------------------------------------------------------------------------------------------------------------------------------------------------------------------------------------------------------------------------------------------------------------------------------------------------------------------------------------------|-----|
| <b>Table S1</b>   | List of materials, chemicals, and suppliers.                                                                                                                                                                                                                                                                                                     | S3  |
| <b>Table S2</b>   | Transitions and collision energies (CEs) of GC-MS/MS for GC-MS/MS detection.                                                                                                                                                                                                                                                                     | S4  |
| <b>Table S3</b>   | Recovery of surrogate standards in passive air samples (PAS), gas phase active air samples (AAS_G), particle samples (GFF), precipitation samples (PCPN), and passive water samples (PWS)                                                                                                                                                        | S5  |
| <b>Table S4</b>   | Basic properties of the nine reliably detected OPEs in our study at 25 °C                                                                                                                                                                                                                                                                        | S5  |
| <b>Table S5</b>   | Details on active air sampling (AAS) and concentration levels of OPEs in the gas phase ( $\text{pg m}^{-3}$ ).                                                                                                                                                                                                                                   | S6  |
| <b>Table S6</b>   | Regressions of the natural logarithm of partial pressure of OPEs in air against reciprocal temperature (in K) using data from PASs deployed during different seasons in Southwestern BC.                                                                                                                                                         | S10 |
| <b>Table S7</b>   | Regressions of the natural logarithm of partial pressure of OPEs in gas phase against reciprocal temperature (in K) using data from one-year of active air sampling in Tadoussac, Saturna Island, and Toronto.                                                                                                                                   | S12 |
| <b>Table S8</b>   | Comparison of OPE concentrations in PAS and AAS ( $\text{pg/m}^3$ ) on Saturna Island and in Tadoussac.                                                                                                                                                                                                                                          | S13 |
| <b>Table S9</b>   | Details on active air sampling (AAS) and concentrations of five OPEs in particle phase ( $\text{pg per cubic meter sampling air}$ ) and fractions of OPEs in the particle phase ( $\Phi$ )                                                                                                                                                       | S14 |
| <b>Table S10</b>  | Regressions of the natural logarithm of partitioning ratio between aerosol and air ( $\text{KPA, m}^3 \text{g}^{-1}$ ) against reciprocal temperature (in K) using data from one-year of active air sampling in Tadoussac, Saturna Island, and Toronto.                                                                                          | S19 |
| <b>Table S11</b>  | OPE concentrations in precipitation and wet deposition flux in Tadoussac and on Saturna Island.                                                                                                                                                                                                                                                  | S20 |
| <b>Table S12</b>  | Comparison of measured scavenging ratios and equilibrium scavenging ratios                                                                                                                                                                                                                                                                       | S22 |
| <b>Table S13</b>  | Details on passive water sampler (PWS) networks and concentration levels of OPEs                                                                                                                                                                                                                                                                 | S23 |
| <b>Table S14</b>  | Water and air fugacity ratio ( $fW/A$ ) of OPEs                                                                                                                                                                                                                                                                                                  | S25 |
| <b>Table S15</b>  | Long-range transport potential (LRTP) assessment for five OPEs                                                                                                                                                                                                                                                                                   | S26 |
| <b>Figure S1</b>  | Molecular structures of the organophosphate esters (OPEs) targeted in this study.                                                                                                                                                                                                                                                                | S27 |
| <b>Figure S2</b>  | Spatial patterns of OPEs in the water in Southwestern British Columbia (BC). The small inserted maps at the bottom right of each panel show the sampling sites located within Victoria. The concentration levels of the duplicated samples from the same site were averaged. The dark dots indicate that at these sites, OPEs were not detected. | S28 |
| <b>Figure S3</b>  | Spatial patterns of OPEs in the water in Southwestern Quebec (QC). The concentration levels of the duplicated samples from the same site were averaged. The dark dots indicate that at these sites, OPEs were not detected.                                                                                                                      | S29 |
| <b>References</b> |                                                                                                                                                                                                                                                                                                                                                  | S30 |

**Table S1** List of materials, chemicals, and suppliers.

| <b>Chemicals</b>                                                | <b>Abbreviation</b>                | <b>Supplier</b>            |
|-----------------------------------------------------------------|------------------------------------|----------------------------|
| <b>Internal Standards</b>                                       |                                    |                            |
| Triethyl Phosphate-d <sub>15</sub>                              | d <sub>15</sub> -TEP               | Wellington Lab (Canada)    |
| Tri-n-propyl Phosphate-d <sub>21</sub>                          | d <sub>21</sub> -TPrP              | Wellington Lab (Canada)    |
| Triphenyl Phosphate-d <sub>15</sub>                             | d <sub>15</sub> -TPhP              | Wellington Lab (Canada)    |
| Tris(2-chloroethyl) phosphate-d <sub>12</sub>                   | d <sub>12</sub> -TCEP              | Wellington Lab (Canada)    |
| Tris(2-butoxy-[ <sup>13</sup> C <sub>2</sub> ]-ethyl) phosphate | <sup>13</sup> C <sub>2</sub> -TBEP | Wellington Lab (Canada)    |
| Tris(1,3-dichloro-2-propyl) phosphate-d <sub>15</sub>           | d <sub>15</sub> -TDCPP             | Wellington Lab (Canada)    |
| Tributyl Phosphate-d <sub>27</sub>                              | d <sub>27</sub> -TBP               | Cambridge Iso. Lab. (U.S.) |
| <b>Injection Standard</b>                                       |                                    |                            |
| Triamyl Phosphate                                               | TAP                                | TCI America (U.S.)         |
| <b>Native Standards</b>                                         |                                    |                            |
| Tri-ethyl phosphate                                             | TEP                                | Wellington Lab (Canada)    |
| Tri-propyl phosphate                                            | TPrP                               | Wellington Lab (Canada)    |
| Tri-n-butyl phosphate                                           | TBP                                | Wellington Lab (Canada)    |
| Tris(2-chloroethyl) phosphate                                   | TCEP                               | Wellington Lab (Canada)    |
| Tris(1-chloro-2-propyl) phosphate                               | TCPP                               | Wellington Lab (Canada)    |
| Tris(1,3-dichloro-2-propyl) phosphate                           | TDCPP                              | Wellington Lab (Canada)    |
| Tris (phenyl)phosphate                                          | TPhP                               | Wellington Lab (Canada)    |
| Tris (2-butoxyethyl) phosphate                                  | TBEP                               | Wellington Lab (Canada)    |
| 2-ethylhexyl-diphenyl phosphate                                 | EHDPP                              | Wellington Lab (Canada)    |
| Tris (2-ethylhexyl) phosphate                                   | TEHP                               | Wellington Lab (Canada)    |
| Tri-o-tolyl phosphate                                           | ToTP                               | Wellington Lab (Canada)    |
| Tri-m-tolyl phosphate                                           | TmTP                               | Wellington Lab (Canada)    |
| Tri-p-tolyl phosphate                                           | TpTP                               | Wellington Lab (Canada)    |
| Tris(2-isopropylphenyl) phosphate                               | T2IPP                              | Wellington Lab (Canada)    |
| Tris(3,5-dimethylphenyl) phosphate                              | T35DMPP                            | Wellington Lab (Canada)    |
| Tris(2,3-dibromopropyl) phosphate                               | TDBPP                              | Wellington Lab (Canada)    |
| <b>Others</b>                                                   |                                    |                            |
| Hexane                                                          |                                    | Millipore Sigma            |
| Acetone                                                         |                                    | Millipore Sigma            |
| Dichloromethane                                                 | DCM                                | Millipore Sigma            |
| Sodium sulfates                                                 | Na <sub>2</sub> SO <sub>4</sub>    | EMD Chemicals Inc.         |
| XAD-2 resin (20-60 mesh)                                        |                                    | Supelpak™                  |
| PUF and filters                                                 |                                    | Tisch Environmental, Inc.. |

**Table S2** Transitions and collision energies (CEs) of GC-MS/MS for GC-MS/MS detection.

| Chemicals                          | Precursor ion | Product ion | CE (eV) |
|------------------------------------|---------------|-------------|---------|
| <b>Spiking Standards</b>           |               |             |         |
| <b>Labeled OPEs</b>                |               |             |         |
| d <sub>15</sub> -TEP               | 167.7         | 103.0       | 15      |
|                                    | 167.1         | 83.0        | 45      |
| d <sub>21</sub> -TPrP              | 151.1         | 102.9       | 5       |
|                                    | 199.2         | 103.0       | 5       |
| d <sub>15</sub> -TPhP              | 341.1         | 223.2       | 35      |
|                                    | 341.1         | 176.0       | 60      |
| d <sub>12</sub> -TCEP              | 261.0         | 196.1       | 5       |
|                                    | 263.0         | 131.0       | 10      |
| <sup>13</sup> C <sub>2</sub> -TBEP | 201.1         | 103.0       | 5       |
|                                    | 303.2         | 103.0       | 5       |
| d <sub>15</sub> -TDCPP             | 394.0         | 163.9       | 10      |
|                                    | 396.0         | 163.8       | 10      |
| d <sub>27</sub> -TBP               | 167.1         | 103.0       | 5       |
|                                    | 231.2         | 103.0       | 5       |
| <b>Injection Standards</b>         |               |             |         |
| TAP                                | 168.8         | 99.0        | 5       |
|                                    | 238.8         | 99.1        | 10      |
| <b>Native Standards</b>            |               |             |         |
| <b>OPEs</b>                        |               |             |         |
| TEP                                | 155.1         | 99.0        | 50      |
|                                    | 99.0          | 80.9        | 20      |
| TPrP                               | 141.9         | 98.9        | 5       |
|                                    | 183.1         | 99.0        | 5       |
| TBP                                | 99.0          | 81.0        | 20      |
|                                    | 155.0         | 99.0        | 5       |
| TCEP                               | 249.0         | 187.0       | 5       |
|                                    | 249.0         | 125.0       | 10      |
| TCPP                               | 201.0         | 125.0       | 5       |
|                                    | 201.0         | 99.0        | 25      |
| TDCPP                              | 191.0         | 75.0        | 10      |
|                                    | 380.9         | 158.9       | 10      |
| TPhP                               | 326.1         | 169.2       | 35      |
|                                    | 326.1         | 214.9       | 35      |
| TBEP                               | 199.0         | 101.1       | 5       |
|                                    | 299.0         | 199.0       | 5       |
| EHDPP                              | 251.0         | 77.0        | 35      |
|                                    | 250.0         | 170.0       | 5       |
| TEHP                               | 99.0          | 81.0        | 25      |
|                                    | 113.0         | 95.0        | 20      |
| ToTP                               | 368.1         | 181.2       | 5       |
|                                    | 368.1         | 165.0       | 60      |
| TmTP                               | 368.1         | 165.0       | 60      |
|                                    | 368.1         | 243.0       | 35      |
| TpTP                               | 368.1         | 243.0       | 35      |
|                                    | 368.1         | 197.3       | 35      |
| T2IPP                              | 118.0         | 91.0        | 35      |
|                                    | 118.0         | 77.0        | 35      |
| T35DMPP                            | 410.2         | 193.1       | 35      |
|                                    | 410.2         | 104.0       | 35      |
| TDBPP                              | 219.0         | 99.0        | 5       |
|                                    | 217.9         | 137.0       | 5       |

**Table S3** Recovery of surrogate standards in passive air samples (PAS), gas phase active air samples (AAS\_G), particle samples (GFF), precipitation samples (PCPN), and passive water samples (PWS)

| Chemicals                          | Recovery Rates (%) |               |              |
|------------------------------------|--------------------|---------------|--------------|
|                                    | AAS                | PCPN          | PWS          |
| d <sub>15</sub> -TEP               | 77.7 ± 20.7        | 88.7 ± 16.8   | 98.3 ± 9.3   |
| d <sub>21</sub> -TPrP              | 118.8 ± 39.2       | 112.5 ± 36.7  | 117.1 ± 11.1 |
| d <sub>27</sub> -TBP               | 142.5 ± 39.9       | 142.1 ± 65.1  | 140.1 ± 15.3 |
| d <sub>12</sub> -TCEP              | 114.6 ± 69.7       | 91.9 ± 46.6   | 154.3 ± 18.3 |
| d <sub>15</sub> -TDCPP             | 133.5 ± 47.5       | 120.9 ± 56.6  | 170.6 ± 35.0 |
| d <sub>15</sub> -TPhP              | 153.9 ± 55.2       | 119.6 ± 49.7  | 122.4 ± 17.7 |
| <sup>13</sup> C <sub>2</sub> -TBEP | 172.9 ± 45.3       | 222.5 ± 136.8 | 232.4 ± 68.6 |

**Table S4** Basic properties of the nine reliably detected OPEs in our study at 25 °C

|       | MW<br>(g/mol) | log <i>K</i> <sub>OW</sub> | log <i>K</i> <sub>OA</sub> | log <i>K</i> <sub>AW</sub> | $\Delta H_{AW}$<br>(kJ/mol) | $\Delta H_{OW}$<br>(kJ/mol) | $\Delta H_{OA}$<br>(kJ/mol) |
|-------|---------------|----------------------------|----------------------------|----------------------------|-----------------------------|-----------------------------|-----------------------------|
| TEP   | 182.2         | 0.66                       | 6.02                       | -5.71                      | 84.4                        | 28.4                        | -56.1                       |
| TPrP  | 224.2         | 2.07                       | 7.17                       | -5.41                      | 99.7                        | 29.6                        | -70.1                       |
| TBP   | 266.3         | 3.65                       | 8.28                       | -4.88                      | 113.3                       | 29.4                        | -84.0                       |
| TCEP  | 285.5         | 1.34                       | 8.53                       | -7.58                      | 91.0                        | 19.8                        | -71.3                       |
| TCPP  | 327.6         | 2.54                       | 8.14                       | -5.99                      | 99.71                       | 31.9                        | -105.0                      |
| TDCPP | 430.9         | 3.51                       | 11.2                       | -8.17                      | 119.8                       | 20.9                        | -98.9                       |
| TPhP  | 326.3         | 4.68                       | 11.69                      | -7.47                      | 109.3                       | 0.6                         | -108.7                      |
| TBEP  | 398.5         | 3.11                       | 12.25                      | -9.88                      | 175.1                       | 59.5                        | -115.3                      |
| EHDPP | 362.4         | 6.16                       | 11.63                      | -5.72                      | 118.7                       | 10.3                        | -108.8                      |

Molecular weight (MW) data were obtained from PubChem and other data in this table could be obtained using the UFZ-LSER database(UFZ-LSER database v 3.2.1 [Internet], 2024).

**Table S5** Details on active air sampling (AAS) and concentration levels of OPEs in the gas phase (pg m<sup>-3</sup>).

|                                                         | Start date | End date   | Sampling<br>Volume (m <sup>3</sup> ) | Temperature<br>(°C) | TEP  | TPrP | TBP  | TCEP  | TCPP  | TDCPP | TPhP | EHDPP | TBEP |
|---------------------------------------------------------|------------|------------|--------------------------------------|---------------------|------|------|------|-------|-------|-------|------|-------|------|
| <b>Saturna Island (coordinates: 48.7753, -123.1283)</b> |            |            |                                      |                     |      |      |      |       |       |       |      |       |      |
| 1                                                       | 2019-12-18 | 2019-12-19 | 377                                  | 6.1                 | 40.6 | N.D. | 2.5  | 13.8  | 9.8   | N.D.  | 4.1  | 0.2   | N.D. |
| 2                                                       | 2020-01-17 | 2020-01-18 | 382                                  | 2.2                 | 10.2 | N.D. | 0.7  | 8.5   | 5.9   | N.D.  | 4.9  | 1.1   | N.D. |
| 3                                                       | 2020-02-14 | 2020-02-15 | 599                                  | 4.9                 | 14.8 | N.D. | 1.2  | 5.9   | 10.9  | N.D.  | 2.5  | 0.2   | N.D. |
| 4                                                       | 2020-03-15 | 2020-03-16 | 581                                  | 3.8                 | 9.5  | N.D. | 1.1  | 9.1   | 1.4   | N.D.  | 1.0  | 0.4   | N.D. |
| 5                                                       | 2020-04-15 | 2020-04-16 | Pump Died                            | 12.5                |      |      |      |       |       |       |      |       |      |
| 6                                                       | 2020-05-11 | 2020-05-12 | 476                                  | 15.4                | 28.3 | N.D. | 5.3  | 80.4  | 133.5 | N.D.  | 4.2  | 1.4   | N.D. |
| 7                                                       | 2020-06-11 | 2020-06-12 | 459                                  | 13.7                | 39.6 | N.D. | 3.9  | 58.4  | 71.0  | N.D.  | 16.7 | 2.9   | N.D. |
| 8                                                       | 2020-07-08 | 2020-07-09 | 409                                  | 14.0                | 32.4 | N.D. | 3.8  | 106.5 | 188.7 | N.D.  | 8.3  | N.D.  | N.D. |
| 9                                                       | 2020-08-06 | 2020-08-07 | 455                                  | 18.3                | 18.2 | N.D. | 2.7  | 51.3  | 77.9  | N.D.  | 8.1  | 2.0   | N.D. |
| 10                                                      | 2020-09-04 | 2020-09-05 | 611                                  | 14.6                | 21.0 | N.D. | 5.8  | 88.4  | 128.3 | N.D.  | 24.7 | 1.0   | N.D. |
| 11                                                      | 2020-10-03 | 2020-10-04 | 437                                  | 13.3                | 22.1 | N.D. | 5.0  | 76.1  | 133.8 | N.D.  | 6.5  | N.D.  | N.D. |
| 12                                                      | 2020-11-01 | 2020-11-02 | 444                                  | 9.2                 | 23.5 | N.D. | 2.7  | 53.8  | 80.2  | N.D.  | 5.0  | N.D.  | N.D. |
| <b>Tadoussac (coordinates: 48.1431, -69.6931)</b>       |            |            |                                      |                     |      |      |      |       |       |       |      |       |      |
| 1                                                       | 2020-12-18 | 2020-12-19 | 362                                  | -10.0               | 3.1  | N.D. | N.D. | 4.2   | 8.5   | N.D.  | N.D. | N.D.  | 37.2 |
| 2                                                       | 2021-01-16 | 2021-01-17 | 487                                  | -2.0                | 4.8  | N.D. | 0.1  | 2.2   | 8.4   | N.D.  | 1.2  | N.D.  | N.D. |
| 3                                                       | 2021-02-14 | 2021-02-15 | 479                                  | -11.8               | 4.0  | N.D. | N.D. | N.D.  | N.D.  | N.D.  | N.D. | N.D.  | 9.7  |
| 4                                                       | 2021-03-13 | 2021-03-14 | 533                                  | -11.8               | 0.2  | N.D. | 0.3  | 49.4  | 16.7  | N.D.  | N.D. | 3.3   | N.D. |

|                                                 | <b>Start date</b> | <b>End date</b> | <b>Sampling<br/>Volume (m<sup>3</sup>)</b> | <b>Temperature<br/>(°C)</b> | <b>TEP</b> | <b>TPrP</b> | <b>TBP</b> | <b>TCEP</b> | <b>T CPP</b> | <b>TDCPP</b> | <b>TPhP</b> | <b>EHDPP</b> | <b>TBEP</b> |
|-------------------------------------------------|-------------------|-----------------|--------------------------------------------|-----------------------------|------------|-------------|------------|-------------|--------------|--------------|-------------|--------------|-------------|
| 5                                               | 2021-04-14        | 2021-04-15      | 515                                        | 4.3                         | 6.4        | N.D.        | 0.7        | 1.6         | 1.8          | N.D.         | 6.9         | 2.6          | N.D.        |
| 6                                               | 2021-05-15        | 2021-05-16      | 452                                        | 6.8                         | 44.2       | N.D.        | 3.1        | 1.4         | 1.0          | N.D.         | 14.2        | 6.5          | N.D.        |
| 7                                               | 2021-06-13        | 2021-06-14      | 496                                        | 11.0                        | 50.7       | N.D.        | 6.1        | 3.1         | 4.8          | N.D.         | 60.7        | 2.4          | 15.4        |
| 8                                               | 2021-07-12        | 2021-07-13      | 545                                        | 15.8                        | 26.1       | N.D.        | 88.6       | 20.3        | 52.4         | 1.6          | 51.6        | 4.5          | N.D.        |
| 9                                               | 2021-08-10        | 2021-08-11      | 537                                        | 18.0                        | 66.6       | N.D.        | 177.4      | 24.5        | 62.7         | 3.2          | 50.6        | N.D.         | N.D.        |
| 10                                              | 2021-09-08        | 2021-09-09      | 450                                        | 14.0                        | 94.8       | N.D.        | 29.4       | 23.6        | 40.3         | 5.7          | 35.4        | N.D.         | 12.5        |
| 11                                              | 2021-10-07        | 2021-10-08      | 526                                        | 11.0                        | 103.0      | N.D.        | 52.6       | 11.5        | 26.8         | 1.5          | 36.2        | 0.0          | N.D.        |
| 12                                              | 2021-11-05        | 2021-11-06      | 460                                        | 3.8                         | 14.0       | N.D.        | 3.2        | 0.3         | 1.0          | N.D.         | 3.1         | 6.3          | 37.2        |
| <b>Toronto (coordinates: 43.7837, -79.1902)</b> |                   |                 |                                            |                             |            |             |            |             |              |              |             |              |             |
| 1                                               | 2020-06-17        | 2020-06-24      | 407                                        | 25.2                        |            | 85.1        | 150.9      | 485.4       | 2936.0       | 12.4         | 82.2        | 7.9          | N.D.        |
| 2                                               | 2020-06-24        | 2020-07-01      | 412                                        | 25.2                        |            | 52.0        | 59.9       | 113.9       | 653.3        | 7.6          | 11.5        | 5.8          | N.D.        |
| 3                                               | 2020-07-01        | 2020-07-08      | 368                                        | 29.2                        |            | 84.8        | 39.7       | 105.4       | 778.8        | 15.8         | 45.0        | 37.6         | N.D.        |
| 4                                               | 2020-07-08        | 2020-07-15      | 394                                        | 27.0                        |            | 61.8        | 41.9       | 133.9       | 684.6        | 6.8          | 15.7        | 4.6          | N.D.        |
| 5                                               | 2020-07-15        | 2020-07-22      | 399                                        | 26.3                        |            | 58.5        | 53.2       | 152.9       | 664.8        | 4.5          | 222.0       | 3.4          | N.D.        |
| 6                                               | 2020-07-22        | 2020-07-29      | 392                                        | 27.0                        |            | 56.6        | 72.3       | 74.6        | 651.7        | 22.0         | 24.9        | 8.2          | N.D.        |
| 7                                               | 2020-07-29        | 2020-08-05      | 416                                        | 24.9                        |            | 21.8        | 14.1       | 65.1        | 264.0        | 20.3         | 108.0       | 2.3          | N.D.        |
| 8                                               | 2020-08-05        | 2020-08-12      | 410                                        | 25.4                        |            | 55.1        | 67.5       | 40.3        | 516.5        | 10.3         | 9.9         | 5.2          | N.D.        |
| 9                                               | 2020-08-12        | 2020-08-19      | 485                                        | 24.5                        |            | 39.3        | 26.5       | 51.0        | 340.6        | 4.0          | 46.3        | 0.8          | N.D.        |
| 10                                              | 2020-08-19        | 2020-08-26      | 397                                        | 26.5                        |            | 42.6        | 46.6       | 45.9        | 600.7        | 2.5          | 19.6        | 2.5          | N.D.        |

|    | <b>Start date</b> | <b>End date</b> | <b>Sampling<br/>Volume (m<sup>3</sup>)</b> | <b>Temperature<br/>(°C)</b> | <b>TEP</b> | <b>TPrP</b> | <b>TBP</b> | <b>TCEP</b> | <b>TCPP</b> | <b>TDCPP</b> | <b>TPhP</b> | <b>EHDPP</b> | <b>TBEP</b> |
|----|-------------------|-----------------|--------------------------------------------|-----------------------------|------------|-------------|------------|-------------|-------------|--------------|-------------|--------------|-------------|
| 11 | 2020-08-26        | 2020-09-02      | 430                                        | 23.4                        |            | 26.3        | 26.6       | 58.2        | 303.0       | 318.9        | 34.2        | 7.1          | N.D.        |
| 12 | 2020-09-02        | 2020-09-09      | 459                                        | 20.8                        |            | 23.1        | 22.6       | 25.6        | 176.9       | 1.3          | 2.9         | N.D.         | N.D.        |
| 13 | 2020-09-09        | 2020-09-16      | 475                                        | 19.1                        |            | 19.1        | 16.6       | 47.6        | 163.2       | 2.3          | 46.6        | N.D.         | N.D.        |
| 14 | 2020-09-16        | 2020-09-23      | 493                                        | 17.4                        |            | 17.3        | 10.8       | 95.3        | 107.1       | N.D.         | N.D.        | 3.4          | N.D.        |
| 15 | 2020-09-23        | 2020-09-30      | 455                                        | 21.1                        |            | 34.5        | 35.6       | 74.5        | 528.0       | 131.9        | 32.2        | 6.8          | N.D.        |
| 16 | 2020-09-30        | 2020-10-07      | 593                                        | 15.0                        |            | 19.6        | 21.6       | 20.0        | 98.5        | 1.0          | 3.6         | N.D.         | N.D.        |
| 17 | 2020-10-07        | 2020-10-14      | 524                                        | 14.7                        |            | 19.8        | 14.1       | 39.0        | 151.8       | 181.5        | 13.0        | 10.1         | N.D.        |
| 18 | 2020-10-14        | 2020-10-21      | 548                                        | 12.6                        |            | 21.6        | 5.9        | 9.4         | 48.7        | 272.1        | 5.7         | 5.1          | N.D.        |
| 19 | 2020-10-21        | 2020-10-28      | 638                                        | 10.8                        |            | 21.5        | 6.4        | 30.7        | 68.9        | 2.0          | 12.5        | N.D.         | N.D.        |
| 20 | 2020-10-28        | 2020-11-04      | 606                                        | 7.2                         |            | 16.9        | 3.5        | 7.2         | 22.9        | 0.7          | 0.3         | N.D.         | N.D.        |
| 21 | 2020-11-04        | 2020-11-11      | 590                                        | 14.7                        |            | 36.8        | 36.8       | 35.4        | 635.0       | 11.2         | 14.4        | N.D.         | N.D.        |
| 22 | 2020-11-11        | 2020-11-18      | 605                                        | 7.2                         |            | 12.7        | 2.6        | 1.9         | 18.1        | 1.6          | 1.1         | N.D.         | N.D.        |
| 23 | 2020-11-18        | 2020-11-25      | 595                                        | 6.8                         |            | 13.0        | 1.9        | N.D.        | 10.5        | N.D.         | 2.5         | N.D.         | N.D.        |
| 24 | 2020-11-25        | 2020-12-02      | 615                                        | 6.6                         |            | 20.5        | 6.9        | 9.4         | 37.0        | 1.3          | 5.2         | 6.4          | N.D.        |
| 25 | 2020-12-02        | 2020-12-09      | 635                                        | 2.5                         |            | 1.7         | 2.5        | N.D.        | 4.1         | 1.8          | 2.1         | N.D.         | N.D.        |
| 26 | 2020-12-09        | 2020-12-16      | 627                                        | 3.3                         |            | 1.9         | 3.7        | 0.8         | 10.6        | 3.3          | 0.6         | N.D.         | N.D.        |
| 27 | 2020-12-16        | 2020-12-23      | 386                                        | 1.9                         |            | 2.4         | 1.3        | N.D.        | 2.4         | 0.2          | 27.7        | N.D.         | N.D.        |
| 28 | 2020-12-23        | 2020-12-30      | 379                                        | 2.2                         |            | 1.6         | 2.7        | N.D.        | 5.4         | N.D.         | N.D.        | N.D.         | N.D.        |
| 29 | 2020-12-30        | 2021-01-06      | 636                                        | 2.8                         |            | 1.9         | 1.9        | 1.5         | 10.3        | 0.5          | 0.8         | N.D.         | N.D.        |



|    | <b>Start date</b> | <b>End date</b> | <b>Sampling<br/>Volume (m<sup>3</sup>)</b> | <b>Temperature<br/>(°C)</b> | <b>TEP</b> | <b>TPrP</b> | <b>TBP</b> | <b>TCEP</b> | <b>TCPP</b> | <b>TDCPP</b> | <b>TPhP</b> | <b>EHDPP</b> | <b>TBEP</b> |
|----|-------------------|-----------------|--------------------------------------------|-----------------------------|------------|-------------|------------|-------------|-------------|--------------|-------------|--------------|-------------|
| 30 | 2021-01-06        | 2021-01-13      | 643                                        | 1.5                         | 1.8        | 1.1         | 0.2        | 3.7         | N.D.        | 1.4          | N.D.        | N.D.         |             |
| 31 | 2021-01-13        | 2021-01-20      | 634                                        | 3.1                         | 2.3        | 4.0         | 1.3        | 12.0        | 1.2         | 3.8          | N.D.        | N.D.         |             |
| 32 | 2021-01-20        | 2021-01-27      | 646                                        | 0.4                         | 1.2        | 1.0         | 5.2        | 4.4         | 1.8         | 4.8          | 13.3        | N.D.         |             |
| 33 | 2021-01-27        | 2021-02-03      | 425                                        | -2.7                        | 1.1        | 1.4         | 15.5       | 19.0        | 0.1         | 6.4          | 12.2        | N.D.         |             |
| 34 | 2021-02-03        | 2021-02-10      | 677                                        | -1.9                        | 1.4        | 0.8         | 4.8        | 4.4         | N.D.        | 4.3          | 12.1        | N.D.         |             |
| 35 | 2021-02-10        | 2021-02-17      | 699                                        | -3.9                        | 1.6        | 0.0         | N.D.       | N.D.        | 0.5         | 8.6          | N.D.        | N.D.         |             |
| 36 | 2021-02-17        | 2021-02-24      | 399                                        | 0.1                         | 2.8        | 0.4         | N.D.       | 2.0         | 1.7         | 0.1          | 7.0         | N.D.         |             |
| 37 | 2021-02-24        | 2021-03-03      | 633                                        | 2.4                         | 1.3        | 5.5         | 1.9        | 27.6        | 2.5         | 18.1         | 34.4        | N.D.         |             |
| 38 | 2021-03-03        | 2021-03-10      | 707                                        | 2.4                         | 2.8        | 1.4         | 8.3        | 13.7        | N.D.        | 5.1          | 17.4        | N.D.         |             |
| 39 | 2021-03-10        | 2021-03-17      | 673                                        | 5.1                         | 1.5        | 0.8         | N.D.       | 4.8         | 0.5         | 63.6         | 0.2         | N.D.         |             |
| 40 | 2021-03-17        | 2021-03-24      | 580                                        | 8.0                         | 3.8        | 9.6         | 2.9        | 75.5        | 1.1         | 0.8          | 0.7         | N.D.         |             |
| 41 | 2021-03-24        | 2021-03-31      | 634                                        | 9.4                         | 1.3        | 4.8         | 12.5       | 67.1        | 0.2         | 3.2          | N.D.        | N.D.         |             |
| 42 | 2021-03-31        | 2021-04-07      | 632                                        | 9.3                         | 2.1        | 1.8         | N.D.       | 9.4         | 0.2         | 0.3          | 4.4         | N.D.         |             |
| 43 | 2021-04-07        | 2021-04-14      | 603                                        | 12.9                        | 1.0        | 8.4         | 49.2       | 197.6       | 5.2         | 42.7         | 5.2         | N.D.         |             |
| 44 | 2021-04-14        | 2021-04-21      | 623                                        | 10.8                        | 1.8        | 1.8         | N.D.       | 19.6        | 1.7         | 0.5          | 3.3         | N.D.         |             |
| 45 | 2021-04-21        | 2021-04-28      | 604                                        | 12.9                        | 1.9        | 7.3         | 1.1        | 27.1        | 3.3         | 5.5          | 1.8         | N.D.         |             |
| 46 | 2021-04-28        | 2021-05-05      | 622                                        | 11.5                        | 2.0        | 5.6         | 17.4       | 70.2        | 2.0         | 0.9          | 6.3         | N.D.         |             |
| 47 | 2021-05-05        | 2021-05-12      | 599                                        | 12.6                        | 1.5        | 1.8         | 4.5        | 27.9        | 1.2         | 18.3         | 8.5         | N.D.         |             |
| 48 | 2021-05-12        | 2021-05-19      | 541                                        | 19.7                        | 7.3        | 21.0        | 24.1       | 860.3       | 2.4         | 11.1         | 22.7        | N.D.         |             |

| <b>Start date</b>              | <b>End date</b> | <b>Sampling<br/>Volume (m<sup>3</sup>)</b> | <b>Temperature<br/>(°C)</b> | <b>TEP</b> | <b>TPrP</b> | <b>TBP</b> | <b>TCEP</b> | <b>TCPP</b> | <b>TDCPP</b> | <b>TPhP</b> | <b>EHDPP</b> | <b>TBEP</b> |
|--------------------------------|-----------------|--------------------------------------------|-----------------------------|------------|-------------|------------|-------------|-------------|--------------|-------------|--------------|-------------|
| <b>MDL (pg m<sup>-3</sup>)</b> |                 |                                            |                             | 5.6        | 0.1         | 2.7        | 8.8         | 9.2         | 1.0          | 4.5         | 4.7          | 0.01        |

The TEP concentrations for samples from Toronto may have interferences in quantification, therefore, these data are not included in this table. Blank corrected instrument-generated data were substituted for levels below the MDLs to avoid bias.

**Table S6** Regressions of the natural logarithm of partial pressure of OPEs in air against reciprocal temperature (in K) using data from PASs deployed during different seasons in Southwestern BC.

|     | $R^2$ |      |      |      |       | Slopes        |              |               |               |                | $\Delta H_{SA-app}$ , kJ mol <sup>-1</sup>         |                   |                    |                    |                     |
|-----|-------|------|------|------|-------|---------------|--------------|---------------|---------------|----------------|----------------------------------------------------|-------------------|--------------------|--------------------|---------------------|
|     | TBP   | TCEP | TCPP | TPhP | EHDPP | TBP           | TCEP         | TCPP          | TPhP          | EHDPP          | TBP                                                | TCEP              | TCPP               | TPhP               | EHDPP               |
| L1  | 0.90  | 0.96 | 0.88 | 0.89 | 0.81  | -2100 ± 700   | -7000 ± 1400 | -6500 ± 2300  | -8900 ± 3100  | -18800 ± 9100  | 17.0 ± 5.8                                         | 58.3 ± 11.8       | 54.1 ± 19.5        | <b>74.3 ± 25.7</b> | <b>156.4 ± 76.1</b> |
| L3  | 0.63  | 0.70 | 0.65 | 0.07 | 0.15  | -7900 ± 4200  | -5500 ± 2600 | -10200 ± 5300 |               |                | <b>65.8 ± 35.3</b>                                 | 45.8 ± 21.3       | <b>84.6 ± 44.0</b> |                    |                     |
| L4  | 0.00  | 0.16 | 0.03 | 0.81 | 0.15  |               |              |               | 11800 ± 4000  |                |                                                    |                   |                    | -98.1 ± 33.3       |                     |
| L5  | 0.01  | 0.04 | 0.54 | 0.61 | 0.55  |               |              | -11500 ± 7400 | -3600 ± 2000  | -18000 ± 11500 |                                                    |                   | <b>95.2 ± 61.6</b> | 29.8 ± 16.9        | <b>149.5 ± 95.3</b> |
| L13 | 0.71  | 0.88 | 0.77 | 0.39 | 0.00  | -6200 ± 3900  | -1100 ± 400  | -4800 ± 2600  |               |                | 51.2 ± 32.5                                        | 9.5 ± 3.5         | 39.9 ± 21.8        |                    |                     |
| L31 | 0.43  | 0.11 | 0.95 | 0.69 | 0.75  | -8700 ± 10000 |              | 6800 ± 1600   | 44900 ± 30400 | 8400 ± 4900    |                                                    |                   | -56.9 ± 13.0       | -373.1 ± 252.4     | -70.2 ± 41.1        |
| L34 | 0.53  | 0.82 | 0.00 | 0.71 | 0.49  | -2900 ± 2700  | -2900 ± 1400 |               | -3300 ± 2100  |                | 23.9 ± 22.6                                        | 23.9 ± 11.3       |                    | 27.7 ± 17.6        |                     |
| L39 | 0.94  | 0.99 | 0.80 | 0.00 | 0.34  | -7400 ± 1900  | -8300 ± 600  | -9900 ± 5000  |               |                | 61.6 ± 15.7                                        | <b>69.3 ± 5.2</b> | 82.0 ± 41.3        |                    |                     |
| L43 | 0.37  | 0.30 | 0.54 | 0.24 | 0.19  |               |              | -11900 ± 4900 |               |                |                                                    |                   | <b>98.8 ± 40.7</b> |                    |                     |
| L44 | 0.84  | 0.99 | 1.00 | 0.73 | 0.01  | -7100 ± 3100  | -6200 ± 500  | -8300 ± 100   | -5400 ± 3200  |                | <b>59.3 ± 25.6</b>                                 | 51.6 ± 4.3        | 69.4 ± 0.5         | 44.6 ± 27.0        |                     |
| L45 | 0.78  | 0.15 | 0.56 | 0.55 | 0.21  | -6800 ± 3600  |              | -5900 ± 5200  | -6800 ± 6100  |                | <b>56.9 ± 29.8</b>                                 |                   | 48.7 ± 43.3        |                    |                     |
|     |       |      |      |      |       |               |              |               |               |                | Theoretical $\Delta H_{SA}$ , kJ mol <sup>-1</sup> |                   |                    |                    |                     |
|     |       |      |      |      |       |               |              |               |               |                | 84-113                                             | 71-91             | 100-105            | 109                | 109-119             |

\*  $\Delta H_{AO}$  is equal to  $-\Delta H_{OA}$  taken from Table S4. The slope and apparent  $\Delta H_{AS}$  only calculated for OPEs with  $R^2$  values greater than 0.5.  $\Delta H_{SA-app}$  values in bold indicate values that are in the range of the predictions.

**Table S7** Regressions of the natural logarithm of partial pressure of OPEs in gas phase against reciprocal temperature (in K) using data from one-year of active air sampling in Tadoussac, Saturna Island, and Toronto.

|                       | $R^2$ | $p$      | $n^{**}$ | Slope         | Apparent $\Delta H_{AS}$ (kJ mol <sup>-1</sup> ) | Theoretical $\Delta H_{AS}^*$ (kJ mol <sup>-1</sup> ) |
|-----------------------|-------|----------|----------|---------------|--------------------------------------------------|-------------------------------------------------------|
| <b>Saturna Island</b> |       |          |          |               |                                                  |                                                       |
| TEP                   | 0.32  | 7.0E-02  | 11       | -4200 ± 2000  | 35 ± 17                                          | 56-84                                                 |
| TBP                   | 0.69  | 1.1E-02  | 8        | -9300 ± 2600  | 77 ± 21                                          | 84-113                                                |
| TCEP                  | 0.75  | 2.4E-03  | 9        | -12100 ± 2600 | 101 ± 22                                         | 71-91                                                 |
| TCPP                  | 0.74  | 3.0E-03  | 9        | -21200 ± 4800 | 176 ± 40                                         | 100-105                                               |
| TPhP                  | 0.16  | 3.2E-01  | 8        | -4100 ± 3800  |                                                  |                                                       |
| EHDPP                 | 0.80  | 2.9E-01  | 3        | -12500 ± 6200 | 104 ± 51                                         | 109-119                                               |
| <b>Tadoussac</b>      |       |          |          |               |                                                  |                                                       |
| TEP                   | 0.77  | 1.7 E-04 | 12       | -11500 ± 2000 | 96 ± 17                                          | 56-84                                                 |
| TBP                   | 0.78  | 7.1E-04  | 10       | -19900 ± 3700 | 165 ± 31                                         | 84-113                                                |
| TCEP                  | 0.02  | 6.7E-01  | 11       | -1800 ± 4100  |                                                  |                                                       |
| TCPP                  | 0.11  | 3.1E-01  | 11       | -3900 ± 3700  |                                                  |                                                       |
| TDCPP                 | 0.10  | 6.9E-01  | 4        | -5500 ± 11900 |                                                  |                                                       |
| TPhP                  | 0.88  | 2.0E-04  | 9        | -16400 ± 2300 | 137 ± 19                                         | 109                                                   |
| TBEP                  | 0.03  | 8.2E-01  | 4        | 600 ± 2200    |                                                  |                                                       |
| EHDPP                 | 0.04  | 7.1E-01  | 6        | -700 ± 1700   |                                                  |                                                       |
| <b>Toronto</b>        |       |          |          |               |                                                  |                                                       |
| TPrP                  | 0.70  | 1.2E-13  | 48       | -10800 ± 1000 | 90 ± 9                                           | 70-100                                                |
| TBP                   | 0.82  | 2.0E-18  | 47       | -11800 ± 800  | 98 ± 7                                           | 84-113                                                |
| TCPP                  | 0.84  | 9.9E-20  | 47       | -15600 ± 1000 | 130 ± 8                                          | 100-105                                               |
| TDCPP                 | 0.36  | 2.4E-05  | 42       | -9700 ± 2000  | 80 ± 17                                          | 99-120                                                |
| TCEP                  | 0.64  | 7.9E-10  | 39       | -12200 ± 1500 | 102 ± 12                                         | 71-91                                                 |
| TPhP                  | 0.33  | 3.0E-05  | 46       | -8400 ± 1800  | 70 ± 15                                          | 109                                                   |
| EHDPP                 | 0.00  | 6.9E-01  | 31       | 600 ± 1600    |                                                  |                                                       |

\*Theoretical  $\Delta H_{AS}$  are between  $\Delta H_{AW}$  and  $\Delta H_{AO}$ , taken from Table S4.  $\Delta H_{AO}$  is equal to  $-\Delta H_{OA}$ . The apparent  $\Delta H_{AS}$  only calculated for OPEs with  $R^2$  values greater than 0.3. \*\* n is the number of samples

**Table S8** Comparison of OPE concentrations in PAS and AAS (pg/m<sup>3</sup>) on Saturna Island and in Tadoussac.

|                                         | Start date | End date   | TBP   | TCEP  | TCPP  | TPhP |
|-----------------------------------------|------------|------------|-------|-------|-------|------|
| <b>Saturna Island</b>                   |            |            |       |       |       |      |
| AAS 7                                   | 2020-06-11 | 2020-06-12 | 3.9   | 58.4  | 71.0  | 16.7 |
| AAS 8                                   | 2020-07-08 | 2020-07-09 | 3.8   | 106.5 | 188.7 | 8.3  |
| AAS 9                                   | 2020-08-06 | 2020-08-07 | 2.7   | 51.3  | 77.9  | 8.1  |
| AAS 10                                  | 2020-09-04 | 2020-09-05 | 5.8   | 88.4  | 128.3 | 24.7 |
| AAS 11                                  | 2020-10-03 | 2020-10-04 | 5.0   | 76.1  | 133.8 | 6.5  |
| AAS 12                                  | 2020-11-01 | 2020-11-02 | 2.7   | 53.8  | 80.2  | 5.0  |
| Average AAS level                       |            |            | 4.0   | 72.4  | 113.3 | 11.6 |
| PAS (site L43) level                    | 2020-05-28 | 2020-10-11 | 36.2  | 17.5  | 67.6  | 26.3 |
| <b>Tadoussac</b>                        |            |            |       |       |       |      |
| AAS 1                                   | 2020-12-18 | 2020-12-19 | N.D.  | 4.2   | 8.5   | N.D. |
| AAS 2                                   | 2021-01-16 | 2021-01-17 | 0.1   | 2.2   | 8.4   | 1.2  |
| AAS 3                                   | 2021-02-14 | 2021-02-15 | N.D.  | N.D.  | N.D.  | N.D. |
| AAS 4                                   | 2021-03-13 | 2021-03-14 | 0.3   | 49.4  | 16.7  | N.D. |
| AAS 5                                   | 2021-04-14 | 2021-04-15 | 0.7   | 1.6   | 1.8   | 6.9  |
| AAS 6                                   | 2021-05-15 | 2021-05-16 | 3.1   | 1.4   | 1.0   | 14.2 |
| AAS 7                                   | 2021-06-13 | 2021-06-14 | 6.1   | 3.1   | 4.8   | 60.7 |
| AAS 8                                   | 2021-07-12 | 2021-07-13 | 88.6  | 20.3  | 52.4  | 51.6 |
| AAS 9                                   | 2021-08-10 | 2021-08-11 | 177.4 | 24.5  | 62.7  | 50.6 |
| AAS 10                                  | 2021-09-08 | 2021-09-09 | 29.4  | 23.6  | 40.3  | 35.4 |
| Average AAS level                       |            |            | 30.8  | 13.5  | 19.7  | 22.7 |
| PAS (site S57 level)                    | 2019-11-29 | 2020-08-24 | < MDL | 6.9   | 12.2  | 23.5 |
| <b>PAS/AAS ratio for Saturna Island</b> |            |            | 9.1   | 0.2   | 0.6   | 2.3  |
| <b>PAS/AAS ratio for Tadoussac</b>      |            |            | N/A   | 0.5   | 0.6   | 1.0  |

**Table S9** Details on active air sampling (AAS) and concentrations of five OPEs in particle phase (pg per cubic meter sampling air) and fractions of OPEs in the particle phase ( $\Phi$ )

| Sample                                                       | Concentration in particle phase<br>( $\mu\text{g m}^{-3}$ ) |       |       |      |       | Fraction of an OPE in particle phase<br>( $\Phi$ , %)* |      |      |      |       | Temperature<br>( $^{\circ}\text{C}$ ) | PM <sub>2.5</sub> concentration<br>( $\mu\text{g m}^{-3}$ )# |
|--------------------------------------------------------------|-------------------------------------------------------------|-------|-------|------|-------|--------------------------------------------------------|------|------|------|-------|---------------------------------------|--------------------------------------------------------------|
|                                                              | TBP                                                         | TCEP  | TCPP  | TPhP | EHDPP | TBP                                                    | TCEP | TCPP | TPhP | EHDPP |                                       |                                                              |
| <b>Saturna Island (coordinates: 48.7753, -123.1283)</b>      |                                                             |       |       |      |       |                                                        |      |      |      |       |                                       |                                                              |
| 1                                                            | 10.9                                                        | 22.8  | 30.3  | N.D. | N.D.  | 81                                                     | 62   | 87   |      |       | 6.1                                   |                                                              |
| 2                                                            | 4.1                                                         | 41.4  | 43.7  | N.D. | N.D.  | 85                                                     | 83   | 88   |      |       | 2.2                                   |                                                              |
| 3                                                            | 6.1                                                         | 13.0  | 38.1  | N.D. | N.D.  | 84                                                     | 69   | 78   |      |       | 4.9                                   |                                                              |
| 4                                                            | 3.5                                                         | 4.7   | 17.2  | N.D. | N.D.  | 72                                                     | 52   | 92   |      |       | 3.8                                   |                                                              |
| 5                                                            |                                                             |       |       |      |       |                                                        |      |      |      |       | 12.5                                  |                                                              |
| 6                                                            | 13.9                                                        | 70.2  | 263.3 | N.D. | N.D.  | 72                                                     | 47   | 66   |      |       | 15.4                                  |                                                              |
| 7                                                            | 8.3                                                         | 79.1  | 176.0 | N.D. | N.D.  | 68                                                     | 58   | 71   |      |       | 13.7                                  |                                                              |
| 8                                                            | 11.9                                                        | 114.9 | 351.0 | N.D. | N.D.  | 76                                                     | 52   | 65   |      |       | 14.0                                  |                                                              |
| 9                                                            | 3.3                                                         | 52.0  | 97.4  | N.D. | N.D.  | 55                                                     | 50   | 56   |      |       | 18.3                                  |                                                              |
| 10                                                           | 1.0                                                         | 42.6  | 48.4  | N.D. | N.D.  | 15                                                     | 33   | 27   |      |       | 14.6                                  |                                                              |
| 11                                                           | 6.0                                                         | 65.5  | 189.0 | N.D. | N.D.  | 55                                                     | 46   | 59   |      |       | 13.3                                  |                                                              |
| 12                                                           | 5.0                                                         | 42.4  | 90.3  | N.D. | N.D.  | 66                                                     | 44   | 53   |      |       | 9.2                                   |                                                              |
| Mean                                                         | 6.7                                                         | 49.9  | 122.3 |      |       | 66                                                     | 54   | 67   |      |       | 10.7                                  |                                                              |
| SD                                                           | 4.0                                                         | 31.7  | 109.3 |      |       | 20                                                     | 14   | 19   |      |       |                                       |                                                              |
| <b>log <math>K_{\text{OA}}</math> at average temperature</b> | 9.0                                                         | 9.1   | 8.8   |      |       |                                                        |      |      |      |       |                                       |                                                              |
| <b>Tadoussac (coordinates: 48.1431, -69.6931)</b>            |                                                             |       |       |      |       |                                                        |      |      |      |       |                                       |                                                              |

|                                                  | Concentration in particle phase |       |      |      |      | Fraction of an OPE in particle phase |     |     |     |     | Temperature | PM <sub>2.5</sub> concentration |
|--------------------------------------------------|---------------------------------|-------|------|------|------|--------------------------------------|-----|-----|-----|-----|-------------|---------------------------------|
|                                                  | (pg m <sup>-3</sup> )           |       |      |      |      | (Φ, %)*                              |     |     |     |     | (°C)        | (μg m <sup>-3</sup> )#          |
| 1                                                | 1.4                             | 2.2   | 6.9  | 14.5 | 16.3 | 100                                  | 35  | 45  | 100 | 100 | -10.0       | 2.3                             |
| 2                                                | 1.3                             | 1.0   | 2.0  | 1.4  | 0.3  | 95                                   | 31  | 19  | 55  | 100 | -2.0        | 5.0                             |
| 3                                                | 0.7                             | 0.5   | 1.4  | 1.1  | 0.5  | 100                                  | 100 | 100 | 100 | 100 | -11.8       | 2.4                             |
| 4                                                | 0.3                             | 0.4   | 0.8  | N.D. | N.D. | 56                                   | 1   | 4   | 100 | 0   | -11.8       | 2.4                             |
| 5                                                | 2.5                             | 1.5   | 3.8  | 0.5  | 0.3  | 78                                   | 49  | 68  | 6   | 11  | 4.3         | 5.4                             |
| 6                                                | 6.7                             | 2.7   | 6.8  | N.D. | N.D. | 68                                   | 67  | 87  | 0   | 0   | 6.8         | 5.5                             |
| 7                                                | 3.2                             | 1.4   | 2.7  | N.D. | 0.9  | 34                                   | 30  | 36  | 0   | 28  | 11.0        | 5.0                             |
| 8                                                | 1.8                             | 0.8   | 1.4  | N.D. | 1.0  | 2                                    | 4   | 3   | 0   | 18  | 15.8        | 4.2                             |
| 9                                                | 1.0                             | 0.7   | 1.6  | 2.4  | 0.6  | 1                                    | 3   | 3   | 5   | 100 | 18.0        | 14.1                            |
| 10                                               | 7.4                             | 2.2   | 6.0  | 0.9  | 0.5  | 20                                   | 9   | 13  | 3   | 16  | 14.0        | 2.9                             |
| 11                                               | 1.1                             | 0.7   | 1.0  | 4.2  | 0.4  | 2                                    | 6   | 4   | 10  | 100 | 11.0        | 6.8                             |
| 12                                               | 5.9                             | 0.6   | 2.3  | N.D. | 0.4  | 65                                   | 71  | 70  | 0   | 6   | 3.8         | 1.8                             |
| Mean                                             | 2.8                             | 1.2   | 3.1  | 2.1  | 1.8  | 52                                   | 34  | 38  | 32  | 48  | 4.1         | 4.8                             |
| SD                                               | 2.5                             | 0.8   | 2.3  | 4.1  | 4.6  | 39                                   | 32  | 36  | 44  | 46  |             |                                 |
| <b>log K<sub>OA</sub> at average temperature</b> | 9.4                             | 9.4   | 9.1  | 13.1 | 13.0 |                                      |     |     |     |     |             |                                 |
| <b>Toronto (coordinates: 43.7837, -79.1902)</b>  |                                 |       |      |      |      |                                      |     |     |     |     |             |                                 |
| 1                                                | 0.1                             | 3.2   | 21.3 | 2.9  | 20.5 | 0                                    | 1   | 1   | 3   | 72  | 25.2        | 9.6                             |
| 2                                                | 0.3                             | 25.0  | 14.6 | 0.9  | 8.4  | 1                                    | 18  | 2   | 7   | 59  | 25.2        | 6.2                             |
| 3                                                | 0.8                             | 106.6 | 40.7 | 1.6  | 10.7 | 2                                    | 50  | 5   | 3   | 22  | 29.2        | 7.1                             |
| 4                                                | 1.6                             | 42.2  | 36.1 | 2.3  | 14.2 | 4                                    | 24  | 5   | 13  | 75  | 27.0        | 6.6                             |

|    | Concentration in particle phase |      |       |      |      | Fraction of an OPE in particle phase |    |    |    |    | Temperature | PM <sub>2.5</sub> concentration |
|----|---------------------------------|------|-------|------|------|--------------------------------------|----|----|----|----|-------------|---------------------------------|
|    | (pg m <sup>-3</sup> )           |      |       |      |      | (Φ, %)*                              |    |    |    |    | (°C)        | (μg m <sup>-3</sup> )#          |
| 5  | 0.1                             | 15.0 | 15.5  | 4.9  | 13.0 | 0                                    | 9  | 2  | 2  | 79 | 26.3        | 6.7                             |
| 6  | 4.3                             | 3.7  | 26.9  | 1.8  | 9.8  | 6                                    | 5  | 4  | 7  | 54 | 27.0        | 6.7                             |
| 7  | 0.4                             | 4.6  | 14.3  | 1.0  | 0.8  | 3                                    | 7  | 5  | 1  | 24 | 24.9        | 5.2                             |
| 8  | 1.0                             | N.D. | 14.6  | 10.6 | 19.6 | 2                                    | 2  | 3  | 52 | 79 | 25.4        | 6.9                             |
| 9  | 0.8                             | 8.7  | 27.5  | 1.5  | 12.5 | 3                                    | 15 | 7  | 3  | 94 | 24.5        | 6.2                             |
| 10 | 2.5                             | 6.0  | 46.4  | 2.1  | 15.3 | 5                                    | 12 | 7  | 10 | 86 | 26.5        | 8.3                             |
| 11 | 1.4                             | 7.6  | 52.6  | 4.1  | 12.2 | 5                                    | 12 | 15 | 11 | 63 | 23.4        | 4.1                             |
| 12 | 5.9                             | 25.2 | 141.4 | 3.4  | 6.8  | 21                                   | 50 | 44 | 54 | 93 | 20.8        | 3.9                             |
| 13 | 2.9                             | 7.9  | 63.3  | 4.7  | 7.8  | 15                                   | 14 | 28 | 9  | 77 | 19.1        | 3.9                             |
| 14 | 1.5                             | 5.5  | 48.6  | 5.8  | 7.3  | 13                                   | 5  | 31 | 72 | 68 | 17.4        | 3.7                             |
| 15 | 1.0                             | 2.9  | 42.2  | 7.2  | 20.2 | 3                                    | 4  | 7  | 18 | 75 | 21.1        | 11.0                            |
| 16 | 4.0                             | 4.2  | 56.3  | 7.2  | 17.1 | 16                                   | 17 | 36 | 67 | 88 | 15.0        | 4.3                             |
| 17 | 3.6                             | 16.9 | 110.2 | 8.5  | 12.8 | 20                                   | 30 | 42 | 40 | 56 | 14.7        | 4.8                             |
| 18 | 8.0                             | 14.1 | 103.6 | 17.3 | 6.8  | 58                                   | 60 | 68 | 75 | 57 | 12.6        | 3.9                             |
| 19 | 9.1                             | 24.2 | 144.1 | 8.5  | 21.9 | 59                                   | 44 | 68 | 40 | 90 | 10.8        | 5.3                             |
| 20 | 10.9                            | 13.0 | 124.2 | 15.0 | 9.1  | 76                                   | 64 | 84 | 98 | 79 | 7.2         | 5.7                             |
| 21 | 1.1                             | 4.6  | 50.6  | 20.0 | 27.5 | 3                                    | 11 | 7  | 58 | 92 | 14.7        | 18.7                            |
| 22 | 14.9                            | 7.5  | 86.6  | 15.6 | 7.9  | 85                                   | 80 | 83 | 93 | 77 | 7.2         | 5.3                             |
| 23 | 13.6                            | 23.5 | 146.7 | 12.9 | 12.9 | 88                                   | 84 | 93 | 84 | 85 | 6.8         | 5.3                             |
| 24 | 15.8                            | 15.6 | 121.9 | 27.8 | 10.8 | 70                                   | 78 | 77 | 84 | 63 | 6.6         | 7.0                             |



|    | Concentration in particle phase |      |       |      |      | Fraction of an OPE in particle phase |    |    |     |    | Temperature | PM <sub>2.5</sub> concentration |
|----|---------------------------------|------|-------|------|------|--------------------------------------|----|----|-----|----|-------------|---------------------------------|
|    | (pg m <sup>-3</sup> )           |      |       |      |      | (Φ, %)*                              |    |    |     |    | (°C)        | (μg m <sup>-3</sup> )#          |
| 25 | 15.8                            | 5.8  | 106.5 | 22.5 | 7.6  | 86                                   | 57 | 96 | 92  | 76 | 2.5         | 6.0                             |
| 26 | 18.6                            | 21.5 | 121.5 | 18.9 | 16.0 | 83                                   | 96 | 92 | 97  | 87 | 3.3         | 10.3                            |
| 27 | 16.4                            | 13.3 | 115.7 | 13.1 | 6.4  | 92                                   | 75 | 98 | 32  | 73 | 1.9         | 10.4                            |
| 28 | 14.6                            | 8.2  | 57.6  | 7.0  | 3.2  | 84                                   | 65 | 91 | 76  | 57 | 2.2         | 4.2                             |
| 29 | 10.8                            | 20.9 | 98.8  | 13.0 | 7.3  | 85                                   | 93 | 91 | 94  | 76 | 2.8         | 7.9                             |
| 30 | 17.3                            | 5.4  | 79.5  | 16.8 | 24.1 | 94                                   | 97 | 96 | 92  | 91 | 1.5         | 9.2                             |
| 31 | 27.4                            | 20.4 | 123.7 | 20.4 | 14.2 | 87                                   | 94 | 91 | 84  | 86 | 3.1         | 13.4                            |
| 32 | 15.4                            | 13.2 | 109.2 | 21.3 | 5.3  | 94                                   | 72 | 96 | 82  | 29 | 0.4         | 5.8                             |
| 33 | 5.8                             | 14.3 | 83.3  | 4.7  | 3.2  | 81                                   | 48 | 81 | 42  | 20 | -2.7        | 4.0                             |
| 34 | 17.1                            | 7.9  | 71.3  | 24.8 | 31.4 | 96                                   | 62 | 94 | 85  | 72 | -1.9        | 7.0                             |
| 35 | 12.5                            | 11.8 | 78.3  | 16.4 | 5.2  | 90                                   | 73 | 94 | 66  | 69 | -3.9        | 5.6                             |
| 36 | 27.1                            | 18.4 | 126.2 | 25.0 | 8.3  | 99                                   | 81 | 98 | 100 | 54 | 0.1         | 9.2                             |
| 37 | 15.1                            | 20.1 | 126.6 | 12.8 | 15.6 | 73                                   | 91 | 82 | 41  | 31 | 2.4         | 7.9                             |
| 38 | 9.0                             | 16.3 | 100.8 | 19.1 | 14.4 | 87                                   | 66 | 88 | 79  | 45 | 2.4         | 6.9                             |
| 39 | 16.4                            | 25.8 | 150.7 | 14.7 | 10.2 | 96                                   | 85 | 97 | 19  | 98 | 5.1         | 6.3                             |
| 40 | 19.4                            | 45.2 | 222.9 | 43.3 | 19.9 | 67                                   | 94 | 75 | 98  | 96 | 8.0         | 10.6                            |
| 41 | 10.1                            | 28.8 | 167.2 | 18.3 | 10.0 | 68                                   | 70 | 71 | 85  | 81 | 9.4         | 5.9                             |
| 42 | 13.1                            | 24.7 | 166.3 | 16.3 | 10.6 | 88                                   | 85 | 95 | 98  | 71 | 9.3         | 7.3                             |
| 43 | 0.9                             | 13.0 | 33.5  | 1.5  | 2.5  | 10                                   | 21 | 14 | 3   | 32 | 12.9        | 6.8                             |
| 44 | 8.1                             | 6.3  | 122.7 | 9.8  | 10.6 | 82                                   | 59 | 86 | 95  | 76 | 10.8        | 5.9                             |

|                                                                     | Concentration in particle phase |      |       |       |       | Fraction of an OPE in particle phase |    |    |    |    | Temperature | PM <sub>2.5</sub> concentration |
|---------------------------------------------------------------------|---------------------------------|------|-------|-------|-------|--------------------------------------|----|----|----|----|-------------|---------------------------------|
|                                                                     | (pg m <sup>-3</sup> )           |      |       |       |       | (Φ, %)*                              |    |    |    |    | (°C)        | (μg m <sup>-3</sup> )#          |
| 45                                                                  | 31.8                            | 24.2 | 159.7 | 9.2   | 11.7  | 81                                   | 96 | 85 | 63 | 87 | 12.9        | 7.1                             |
| 46                                                                  | 8.0                             | 33.1 | 167.3 | 4.8   | 6.8   | 59                                   | 66 | 70 | 84 | 52 | 11.5        | 6.7                             |
| 47                                                                  | 5.3                             | 5.8  | 125.0 | 4.8   | 5.5   | 74                                   | 56 | 82 | 21 | 39 | 12.6        | 3.3                             |
| 48                                                                  | 1.1                             | 4.3  | 46.9  | 15.2  | 28.7  | 5                                    | 15 | 5  | 58 | 56 | 19.7        | 9.8                             |
| Mean                                                                | 9.2                             | 16.6 | 89.8  | 11.7  | 12.2  | 50                                   | 50 | 56 | 54 | 68 | 12.2        | 7.0                             |
| SD                                                                  | 8.0                             | 16.5 | 50.5  | 8.7   | 6.8   | 38                                   | 32 | 38 | 35 | 21 |             |                                 |
| <b>log K<sub>OA</sub> at average temperature</b>                    | 8.9                             | 9.1  | 8.7   | 12.5  | 12.4  |                                      |    |    |    |    |             |                                 |
| <b>log K<sub>PA</sub> at 15 °C** (m<sup>3</sup> g<sup>-1</sup>)</b> | 1.2                             | 2.0  | 1.6   | 4.8   | 4.7   |                                      |    |    |    |    |             |                                 |
| <b>MDL (pg m<sup>-3</sup>)</b>                                      | 0.6                             | 0.7  | 1.1   | 0.001 | 0.001 |                                      |    |    |    |    |             |                                 |

½ MDLs were used for not detected samples when the mean and standard deviation (SD) were calculated for the concentrations of OPEs in particle phase. Values of 0 were assigned to samples for which blank-correction yielded negative concentrations.

\* ½ MDLs were used for data lower than MDLs. For TPhP and EHDPP in Tadoussac, more than 50% Φ data points were calculated using ½ MDLs, which may have high uncertainties; thus, they were not considered reliable.

\*\* K<sub>PA</sub> is the average partitioning ratio between aerosol and air (m<sup>3</sup> air g<sup>-1</sup> aerosol), which could be calculated using the UFZ-LSER database (UFZ-LSER database v 3.2.1 [Internet], 2024).

# PM<sub>2.5</sub> concentration at Tadoussac and Toronto were obtained from the national air pollution surveillance program (NAPS) stations 53201 and 60410, respectively.

**Table S10** Regressions of the natural logarithm of partitioning ratio between aerosol and air ( $K_{PA}$ ,  $\text{m}^3 \text{g}^{-1}$ ) against reciprocal temperature (in K) using data from one-year of active air sampling in Tadoussac, Saturna Island, and Toronto.

|                          | $R^2$ | $p$     | $n^*$ | Slope        | Apparent $\Delta H_{AS}$ ( $\text{kJ mol}^{-1}$ ) | $\Delta H_{AO}$ ( $\text{kJ mol}^{-1}$ )** |
|--------------------------|-------|---------|-------|--------------|---------------------------------------------------|--------------------------------------------|
| <b>Saturna Island***</b> |       |         |       |              |                                                   |                                            |
| TBP                      | 0.38  | 5.6E-02 | 10    | 9700 ± 4300  | 80.4 ± 36.0                                       | 84.0                                       |
| TCEP                     | 0.61  | 7.6E-03 | 10    | 7600 ± 2200  | 63.3 ± 17.9                                       | 71.3                                       |
| TCPP                     | 0.57  | 1.2E-02 | 10    | 10600 ± 3300 | 88.2 ± 27.3                                       | 105.0                                      |
| <b>Tadoussac</b>         |       |         |       |              |                                                   |                                            |
| TBP                      | 0.53  | 1.6E-02 | 10    | 18400 ± 6100 | 152.7 ± 50.5                                      | 84.0                                       |
| TCEP                     | 0.44  | 3.7E-02 | 10    | 11600 ± 4700 | 96.5 ± 38.7                                       | 71.3                                       |
| TCPP                     | 0.14  | 2.6E-01 | 11    |              |                                                   |                                            |
| TPhP                     | 0.80  | 3.9E-02 | 5     | 14100 ± 4000 | 117.4 ± 33.4                                      | 108.7                                      |
| EHDPP                    | 0.52  | 2.4E-01 | 4     | -5100 ± 3500 | -42.2 ± 28.9                                      |                                            |
| <b>Toronto</b>           |       |         |       |              |                                                   |                                            |
| TBP                      | 0.78  | 1.7E-16 | 47    | 21300 ± 1700 | 177.3 ± 13.9                                      | 84.0                                       |
| TCEP                     | 0.55  | 9.8E-08 | 37    | 13400 ± 2000 | 111.8 ± 16.8                                      | 71.3                                       |
| TCPP                     | 0.79  | 1.2E-16 | 47    | 19500 ± 1500 | 162.2 ± 12.6                                      | 105.0                                      |
| TPhP                     | 0.49  | 7.4E-08 | 46    | 14000 ± 2200 | 116.4 ± 15.4                                      | 108.7                                      |
| EHDPP                    | 0.02  | 4.0E-01 | 32    |              |                                                   |                                            |

\* n is the number of samples.

\*\*  $\Delta H_{AO}$  is equal to  $-\Delta H_{OA}$  taken from Table S4. The apparent  $\Delta H_{AS}$  only calculated for OPEs with  $R^2$  values greater than 0.3 and  $p$  value lower than 0.1.

\*\*\* The concentrations of  $\text{PM}_{2.5}$  near the sampling site on Saturna Island are not available; thus, a constant  $\text{PM}_{2.5}$  concentration was used for linear regressions. To avoid high uncertainties, only samples reliably detected were used for the linear regressions.

**Table S11** OPE concentrations in precipitation and wet deposition flux in Tadoussac and on Saturna Island.

|                       |            | mm            | Concentration, ng/L |      |       |       |       |      |      |       |      | Wet deposition flux, ng/m <sup>2</sup> /day |       |       |       |      |       |       |  |
|-----------------------|------------|---------------|---------------------|------|-------|-------|-------|------|------|-------|------|---------------------------------------------|-------|-------|-------|------|-------|-------|--|
|                       |            | Precipitation | TEP                 | TBP  | TCEP  | TCPP  | TDCPP | TPhP | TBEP | EHDPP | TEP  | TBP                                         | TCEP  | TCPP  | TDCPP | TPhP | TBEP  | EHDPP |  |
| <b>Saturna Island</b> |            |               |                     |      |       |       |       |      |      |       |      |                                             |       |       |       |      |       |       |  |
| 2019-12-18            | 2020-01-17 | 106.2         | 4.4                 | 5.9  | 117.1 | 126.8 | 28.0  | 3.8  | 81.2 | 7.3   | 15.7 | 20.8                                        | 414.5 | 448.9 | 99.1  | 13.4 | 287.5 | 25.8  |  |
| 2020-01-17            | 2020-02-14 | 189.3         | Sample lost         |      |       |       |       |      |      |       |      |                                             |       |       |       |      |       |       |  |
| 2020-02-14            | 2020-03-15 | 92.5          | 2.1                 | 1.4  | 1.1   | 2.8   | 7.0   | 0.6  | 1.2  | 0.3   | 6.3  | 4.3                                         | 3.4   | 8.5   | 21.6  | 1.7  | 3.8   | 0.9   |  |
| 2020-03-15            | 2020-04-15 | 45.9          | 4.6                 | 4.2  | 10.7  | 23.1  | 11.0  | 1.0  | 11.2 | 0.4   | 6.9  | 6.3                                         | 15.8  | 34.1  | 16.3  | 1.4  | 16.6  | 0.6   |  |
| 2020-04-15            | 2020-05-11 | 38.7          | 2.3                 | 2.7  | 4.0   | 11.9  | 17.8  | 0.8  | 8.1  | 0.5   | 3.4  | 4.0                                         | 5.9   | 17.6  | 26.5  | 1.1  | 12.0  | 0.8   |  |
| 2020-05-11            | 2020-06-11 | 46.9          | 1.7                 | 2.4  | 4.6   | 9.0   | 17.8  | 0.6  | 5.1  | 0.3   | 2.6  | 3.6                                         | 6.9   | 13.6  | 26.9  | 1.0  | 7.7   | 0.5   |  |
| 2020-06-11            | 2020-07-08 | 32.4          | 1.5                 | 4.1  | 9.6   | 34.8  | 24.4  | 0.7  | 19.3 | 0.7   | 1.8  | 5.0                                         | 11.5  | 41.8  | 29.3  | 0.8  | 23.2  | 0.8   |  |
| 2020-07-08            | 2020-08-06 | 21.2          | 7.2                 | 11.5 | 8.5   | 26.4  | 18.9  | 1.1  | 5.8  | 1.6   | 5.3  | 8.4                                         | 6.2   | 19.3  | 13.8  | 0.8  | 4.2   | 1.1   |  |
| 2020-08-06            | 2020-09-04 | 25.0          | 1.4                 | 5.8  | 7.6   | 23.6  | 41.4  | 0.5  | 4.1  | 0.6   | 1.2  | 5.0                                         | 6.6   | 20.3  | 35.7  | 0.5  | 3.5   | 0.5   |  |
| 2020-09-04            | 2020-10-03 | 58.1          | 2.3                 | 2.4  | 3.9   | 9.2   | 19.4  | 0.6  | 9.5  | 0.6   | 4.7  | 4.9                                         | 7.8   | 18.3  | 39.0  | 1.2  | 19.1  | 1.2   |  |
| 2020-10-03            | 2020-11-01 | 89.7          | 3.7                 | 2.1  | 4.2   | 11.5  | 38.6  | 1.3  | 1.5  | 0.5   | 11.4 | 6.4                                         | 12.9  | 35.6  | 119.5 | 4.0  | 4.6   | 1.6   |  |
| 2020-11-01            | 2020-12-01 | 130.7         | 1.7                 | 1.2  | 0.8   | 3.4   | 5.5   | 0.5  | 3.5  | 0.2   | 7.5  | 5.2                                         | 3.7   | 14.8  | 24.0  | 2.4  | 15.2  | 1.0   |  |
| Mean                  |            | 73.1          | 3.0                 | 4.0  | 15.6  | 25.7  | 20.9  | 1.0  | 13.7 | 1.2   | 6.1  | 6.7                                         | 45.0  | 61.2  | 41.1  | 2.6  | 36.1  | 3.2   |  |
| <b>Tadoussac</b>      |            |               |                     |      |       |       |       |      |      |       |      |                                             |       |       |       |      |       |       |  |
| 2020-12-18            | 2021-01-16 | 49.5          | 1.2                 | 0.8  | 6.0   | 15.4  | 16.5  | 0.8  | 4.4  | 2.7   | 2.1  | 1.3                                         | 10.3  | 26.3  | 28.2  | 1.4  | 7.6   | 4.6   |  |
| 2021-01-16            | 2021-02-14 | 46.0          | 1.2                 | 0.4  | 2.7   | 3.0   | 55.7  | 0.7  | 3.3  | 0.3   | 1.9  | 0.7                                         | 4.2   | 4.8   | 88.3  | 1.2  | 5.2   | 0.5   |  |
| 2021-02-14            | 2021-03-13 | 34.6          | 1.2                 | 0.8  | 2.7   | 5.3   | 11.9  | 1.1  | 2.2  | 0.4   | 1.6  | 1.1                                         | 3.4   | 6.8   | 15.2  | 1.4  | 2.8   | 0.6   |  |
| 2021-03-13            | 2021-04-14 | 48.0          | 0.6                 | 0.4  | 1.3   | 4.5   | 12.5  | 0.5  | 2.4  | 0.3   | 0.9  | 0.5                                         | 2.0   | 6.7   | 18.8  | 0.8  | 3.5   | 0.4   |  |
| 2021-04-14            | 2021-2015  | 67.3          | 2.2                 | 0.3  | 1.4   | 4.7   | 26.1  | 0.5  | 1.8  | 0.2   | 4.7  | 0.7                                         | 3.0   | 10.2  | 56.7  | 1.0  | 3.9   | 0.4   |  |
| 2021-05-15            | 2021-06-13 | 18.9          | 1.8                 | 0.8  | 2.8   | 5.9   | 259.8 | 0.7  | 4.1  | 0.3   | 1.2  | 0.5                                         | 1.8   | 3.9   | 169.3 | 0.5  | 2.6   | 0.2   |  |
| 2021-06-13            | 2021-07-12 | 82.9          | 0.6                 | 0.5  | 1.0   | 2.9   | 6.2   | 0.4  | 1.8  | 0.2   | 1.8  | 1.5                                         | 2.9   | 8.1   | 17.8  | 1.1  | 5.1   | 0.6   |  |

|             |            |      |         |         |         |         |         |         |         |         |     |     |      |      |      |     |      |     |
|-------------|------------|------|---------|---------|---------|---------|---------|---------|---------|---------|-----|-----|------|------|------|-----|------|-----|
| 2021-07-12  | 2021-08-10 | 44.2 | 0.3     | 0.5     | 1.1     | 3.6     | 6.7     | 0.7     | 0.0     | 0.3     | 0.5 | 0.8 | 1.7  | 5.6  | 10.1 | 1.1 | 0.0  | 0.4 |
| 2021-08-10  | 2021-09-08 | 17.7 | 1.6     | 0.6     | 1.0     | 2.8     | 4.3     | 0.4     | 1.6     | 0.3     | 1.0 | 0.4 | 0.6  | 1.7  | 2.6  | 0.3 | 1.0  | 0.2 |
| 2021-09-08  | 2021-10-07 | 92.4 | 1.0     | 0.4     | 0.9     | 1.4     | 3.5     | 0.7     | 1.8     | 0.4     | 3.0 | 1.3 | 2.7  | 4.5  | 11.1 | 2.4 | 5.8  | 1.4 |
| 2021-10-07  | 2021-11-05 | 95.2 | 1.1     | 1.0     | 7.7     | 6.2     | 4.0     | 0.6     | 7.5     | 0.2     | 3.5 | 3.3 | 25.3 | 20.5 | 13.1 | 2.0 | 24.7 | 0.7 |
| <b>Mean</b> |            | 54.2 | 1.2     | 0.6     | 2.6     | 5.1     | 37.0    | 0.6     | 2.8     | 0.5     | 2.0 | 1.1 | 5.3  | 9.0  | 39.2 | 1.2 | 5.6  | 0.9 |
| <b>MDL</b>  |            |      | 1.1E-04 | 1.0E-01 | 2.8E-04 | 1.3E-01 | 1.3E-03 | 5.9E-04 | 1.5E-03 | 4.1E-05 |     |     |      |      |      |     |      |     |

**Table S12** Comparison of measured scavenging ratios and equilibrium scavenging ratios

|                       | Temperature<br>(°C) | Measured scavenging ratio, MSR |         |         |         |         |         |         |         | Ratio between MSR and estimated scavenging ratio ESR* |         |         |         |         |         |      |       |
|-----------------------|---------------------|--------------------------------|---------|---------|---------|---------|---------|---------|---------|-------------------------------------------------------|---------|---------|---------|---------|---------|------|-------|
|                       |                     | TEP                            | TBP     | TCEP    | TCPP    | TDCPP   | TPhP    | TBEP    | EHDPP   | TEP                                                   | TBP     | TCEP    | TCPP    | TDCPP   | TPhP    | TBEP | EHDPP |
| <b>Saturna Island</b> |                     |                                |         |         |         |         |         |         |         |                                                       |         |         |         |         |         |      |       |
| 2019-12-18            | 6.05                | 1.1E+05                        | 4.4E+05 | 3.2E+06 | 3.2E+06 |         | 9.0E+05 |         | 4.0E+07 |                                                       | 9.2E-01 | 1.9E-02 | 1.3E+00 |         |         |      |       |
| 2020-01-17            | 2.15                |                                |         |         |         |         |         |         |         |                                                       |         |         |         |         |         |      |       |
| 2020-02-14            | 4.90                | 1.4E+05                        | 1.9E+05 | 5.9E+04 | 5.6E+04 |         | 2.2E+05 |         | 1.2E+06 |                                                       | 3.9E-01 | 3.5E-04 | 1.2E-02 |         |         |      |       |
| 2020-03-15            | 3.75                | 4.8E+05                        | 9.2E+05 | 7.7E+05 | 1.2E+06 |         | 8.9E+05 |         | 1.2E+06 |                                                       | 1.1E+00 | 2.5E-03 | 5.8E-01 |         |         |      |       |
| 2020-04-15            | 12.50               |                                |         |         |         |         |         |         |         |                                                       |         |         |         |         |         |      |       |
| 2020-05-11            | 15.35               | 6.1E+04                        | 1.2E+05 | 3.0E+04 | 2.3E+04 |         | 1.5E+05 |         | 2.4E+05 |                                                       | 5.1E-01 | 4.4E-04 | 1.5E-02 |         |         |      |       |
| 2020-06-11            | 13.70               | 3.7E+04                        | 3.4E+05 | 7.0E+04 | 1.4E+05 |         | 3.9E+04 |         | 2.3E+05 |                                                       | 1.2E+00 | 1.0E-03 | 8.6E-02 |         |         |      |       |
| 2020-07-08            | 14.00               | 2.2E+05                        | 7.3E+05 | 3.9E+04 | 4.9E+04 |         | 1.4E+05 |         | 1.2E+06 |                                                       | 2.8E+00 | 5.2E-04 | 2.6E-02 |         |         |      |       |
| 2020-08-06            | 18.30               | 7.5E+04                        | 9.6E+05 | 7.4E+04 | 1.3E+05 |         | 6.6E+04 |         | 2.8E+05 |                                                       | 4.7E+00 | 1.7E-03 | 1.1E-01 |         |         |      |       |
| 2020-09-04            | 14.60               | 1.1E+05                        | 3.6E+05 | 3.0E+04 | 5.2E+04 |         | 2.5E+04 |         | 6.0E+05 |                                                       | 9.8E-01 | 3.1E-04 | 1.6E-02 |         |         |      |       |
| 2020-10-03            | 13.25               | 1.7E+05                        | 1.9E+05 | 2.9E+04 | 3.6E+04 |         | 1.9E+05 |         | 4.0E+05 |                                                       | 5.7E-01 | 3.2E-04 | 1.5E-02 |         |         |      |       |
| 2020-11-01            | 9.15                | 7.2E+04                        | 1.5E+05 | 8.8E+03 | 2.0E+04 |         | 1.1E+05 |         | 1.7E+05 |                                                       | 3.3E-01 | 5.3E-05 | 3.9E-03 |         |         |      |       |
| <b>Tadoussac</b>      |                     |                                |         |         |         |         |         |         |         |                                                       |         |         |         |         |         |      |       |
| 2020-12-18            | -10.00              | 1.1E+05                        | 5.4E+05 | 9.3E+05 | 1.0E+06 | 8.2E+06 | 5.6E+04 | 1.2E+05 | 1.7E+05 |                                                       | 2.7E+00 | 2.9E-04 | 6.6E-03 | 2.8E-01 | 8.3E-01 |      |       |
| 2021-01-16            | -2.00               | 2.5E+05                        | 3.0E+05 | 8.4E+05 | 2.9E+05 | 2.8E+10 | 2.8E+05 | 4.4E+08 | 1.2E+06 |                                                       | 5.9E-01 | 8.4E-04 | 5.4E-03 | 2.6E-04 | 6.1E+00 |      |       |
| 2021-02-14            | -11.75              | 2.4E+05                        | 1.2E+06 | 5.0E+06 | 3.7E+06 | 5.9E+09 | 1.0E+06 | 2.2E+05 | 8.2E+05 |                                                       | 6.1E+00 | 2.5E+01 | 1.9E+01 | 5.1E+00 | 4.1E+00 |      |       |
| 2021-03-13            | -11.75              | 1.9E+06                        | 6.3E+05 | 2.7E+04 | 2.6E+05 | 6.3E+09 |         | 3.1E+08 | 7.9E+04 |                                                       | 3.1E-02 | 4.1E-06 | 7.1E-04 | 0.0E+00 | 1.8E-04 |      |       |
| 2021-04-14            | 4.25                | 3.4E+05                        | 9.7E+04 | 4.6E+05 | 8.5E+05 | 1.3E+10 | 6.2E+04 | 2.4E+08 | 6.1E+04 |                                                       | 1.5E-01 | 1.5E-03 | 1.1E-01 | 8.4E-05 | 3.6E-03 |      |       |
| 2021-05-15            | 6.75                | 4.1E+04                        | 7.7E+04 | 6.8E+05 | 7.5E+05 | 1.3E+11 | 5.2E+04 | 5.4E+08 | 5.3E+04 |                                                       | 1.3E-01 | 4.9E-03 | 3.4E-01 | 1.0E-04 | 4.4E-03 |      |       |
| 2021-06-13            | 11.00               | 1.2E+04                        | 5.7E+04 | 2.3E+05 | 3.8E+05 | 3.1E+09 | 6.3E+03 | 1.2E+05 | 6.5E+04 |                                                       | 1.1E-01 | 1.4E-03 | 7.5E-02 | 2.5E-05 | 1.6E-02 |      |       |
| 2021-07-12            | 15.75               | 1.3E+04                        | 5.8E+03 | 5.2E+04 | 6.8E+04 | 4.2E+06 | 1.4E+04 | 0.0E+00 | 4.8E+04 |                                                       | 1.8E-02 | 4.4E-04 | 1.8E-02 | 1.1E-04 | 2.4E-02 |      |       |
| 2021-08-10            | 18.00               | 2.3E+04                        | 3.5E+03 | 3.9E+04 | 4.4E+04 | 6.5E+05 | 8.3E+03 | 2.1E+08 | 5.0E+05 |                                                       | 1.5E-02 | 4.4E-04 | 1.7E-02 | 1.0E-04 | 2.5E+00 |      |       |
| 2021-09-08            | 14.00               | 1.0E+04                        | 1.1E+04 | 3.3E+04 | 3.1E+04 | 6.1E+05 | 2.0E+04 | 1.5E+05 | 9.3E+05 |                                                       | 2.9E-02 | 2.4E-04 | 7.0E-03 | 1.3E-04 | 3.3E-01 |      |       |
| 2021-10-07            | 11.00               | 1.0E+04                        | 1.9E+04 | 6.3E+05 | 2.2E+05 | 2.6E+06 | 1.5E+04 | 1.0E+09 | 6.3E+05 |                                                       | 2.7E-02 | 2.9E-03 | 2.9E-02 | 6.6E-05 | 3.1E+00 |      |       |

\* We obtained the estimated scavenging ratios (ESRs) assuming equilibrium between OPE in the atmospheric gas phase and water droplets (Oh et al., 2023), and that all OPEs are sorbed to the same particles, which are scavenged with a scavenging ratio  $W_p$  of 200,000 (Kim et al., 2006). Therefore, they should be equal to  $(1-\Phi)K_{WA} + \Phi W_p$ , where  $K_{WA}$  is the temperature-adjusted partitioning ratio between water and air ( $K_{WA} = K_{AW}^{-1}$ , Table S4).

**Table S13** Details on passive water sampler (PWS) networks and concentration levels of OPEs

|                        | Start Date | End Date   | days | Latitude | Longitude | ng L <sup>-1</sup> |         |         |         |         |         |         |
|------------------------|------------|------------|------|----------|-----------|--------------------|---------|---------|---------|---------|---------|---------|
|                        |            |            |      |          |           | TBP                | TCEP    | TCPP    | TDCPP   | TPhP    | EHDPP   | TEHP    |
| <b>Southwestern BC</b> |            |            |      |          |           |                    |         |         |         |         |         |         |
| V1_Top                 | 2021-06-21 | 2021-07-26 | 35   | 49.2916  | -122.8863 | 4.8E+00            | N.D.    | N.D.    | 2.8E+01 | N.D.    | 6.2E-03 | N.D.    |
| V1_Mid                 | 2021-06-21 | 2021-07-26 | 35   | 49.2916  | -122.8863 | N.D.               | 1.5E+02 | N.D.    | N.D.    | N.D.    | 4.7E-03 | 4.4E-03 |
| V1_Bot                 | 2021-06-21 | 2021-07-26 | 35   | 49.2916  | -122.8863 | N.D.               | N.D.    | N.D.    | N.D.    | N.D.    | N.D.    | N.D.    |
| V2_1_Top               | 2021-06-29 | 2021-07-20 | 21   | 49.3204  | -122.9102 | 1.3E+01            | N.D.    | N.D.    | N.D.    | N.D.    | 1.7E-02 | N.D.    |
| V2_1_Bot               | 2021-06-29 | 2021-07-26 | 27   | 49.3204  | -122.9102 | 9.1E+00            | N.D.    | N.D.    | N.D.    | N.D.    | 1.9E-02 | N.D.    |
| V2_Top                 | 2021-07-20 | 2021-08-09 | 20   | 49.3204  | -122.9102 | 1.3E+01            | N.D.    | N.D.    | N.D.    | N.D.    | 8.9E-03 | 1.9E-02 |
| V2_Bot                 | 2021-07-20 | 2021-08-09 | 20   | 49.3204  | -122.9102 | 1.7E+01            | N.D.    | 5.4E+00 | 1.9E+01 | N.D.    | N.D.    | 2.1E-02 |
| V3_1                   | 2021-05-14 | 2021-06-03 | 20   | 49.3400  | -123.2335 | N.D.               | N.D.    | N.D.    | N.D.    | N.D.    | 1.3E-02 | N.D.    |
| V3_2                   | 2021-05-14 | 2021-06-03 | 20   | 49.3400  | -123.2335 | 5.5E+00            | N.D.    | N.D.    | N.D.    | N.D.    | 2.0E-02 | N.D.    |
| V3_3                   | 2021-05-14 | 2021-06-03 | 20   | 49.3400  | -123.2335 | 8.1E+00            | N.D.    | N.D.    | N.D.    | N.D.    | 2.1E-02 | N.D.    |
| V4_Top                 | 2021-07-09 | 2021-07-30 | 21   | 49.1803  | -123.1848 | 1.7E-01            | N.D.    | N.D.    | N.D.    | N.D.    | 1.3E-02 | 5.5E-03 |
| V4_Mid                 | 2021-07-09 | 2021-07-30 | 21   | 49.1803  | -123.1848 | 3.6E+00            | N.D.    | N.D.    | N.D.    | N.D.    | 2.0E-02 | 1.1E-02 |
| V4_Bot                 | 2021-07-09 | 2021-07-30 | 21   | 49.1803  | -123.1848 | N.D.               | N.D.    | N.D.    | N.D.    | N.D.    | 1.5E-02 | 4.0E-03 |
| V4_1_Top               | 2021-07-30 | 2021-08-20 | 21   | 49.1803  | -123.1848 | 1.8E+00            | N.D.    | N.D.    | N.D.    | N.D.    | 1.7E-02 | 7.3E-03 |
| V4_1_Mid               | 2021-07-30 | 2021-08-20 | 21   | 49.1803  | -123.1848 | 2.3E+00            | N.D.    | N.D.    | N.D.    | N.D.    | 1.8E-02 | 7.1E-03 |
| V4_1_Bot               | 2021-07-30 | 2021-08-20 | 21   | 49.1803  | -123.1848 | 3.9E+00            | N.D.    | N.D.    | N.D.    | N.D.    | 1.5E-02 | 5.7E-03 |
| V5_1_Top               | 2021-06-03 | 2021-06-24 | 21   | 49.0807  | -123.1302 | 1.6E+01            | N.D.    | N.D.    | 3.1E+01 | N.D.    | 1.4E-02 | 2.1E-04 |
| V5_1_Mid               | 2021-06-03 | 2021-06-24 | 21   | 49.0807  | -123.1302 | 2.1E+01            | N.D.    | 5.0E+00 | N.D.    | N.D.    | 1.2E-02 | 3.5E-04 |
| V5_1_Bot               | 2021-06-03 | 2021-06-24 | 21   | 49.0807  | -123.1302 | 1.3E+01            | N.D.    | N.D.    | 2.3E+01 | N.D.    | 1.2E-02 | N.D.    |
| V5_Top                 | 2021-06-24 | 2021-07-15 | 21   | 49.0807  | -123.1302 | 1.0E+01            | N.D.    | N.D.    | N.D.    | N.D.    | N.D.    | N.D.    |
| V5_Mid                 | 2021-06-24 | 2021-07-15 | 21   | 49.0807  | -123.1302 | 3.9E+00            | N.D.    | N.D.    | N.D.    | N.D.    | 4.6E-03 | 3.9E-04 |
| V5_Bot                 | 2021-06-24 | 2021-07-15 | 21   | 49.0807  | -123.1302 | N.D.               | N.D.    | N.D.    | 1.4E+01 | N.D.    | N.D.    | N.D.    |
| V6_Top                 | 2021-08-10 | 2021-09-01 | 22   | 48.4382  | -123.3816 | N.D.               | N.D.    | N.D.    | N.D.    | 4.4E-01 | 2.9E-02 | 9.0E-02 |
| V6_Mid                 | 2021-08-10 | 2021-09-01 | 22   | 48.4382  | -123.3816 | N.D.               | N.D.    | N.D.    | 3.0E+01 | N.D.    | 2.5E-02 | 6.7E-02 |
| V6_Bot                 | 2021-08-10 | 2021-09-01 | 22   | 48.4382  | -123.3816 | N.D.               | N.D.    | N.D.    | N.D.    | 2.8E-01 | 2.8E-02 | 6.1E-02 |
| V7_Top                 | 2021-08-10 | 2021-09-01 | 22   | 48.4275  | -123.3714 | N.D.               | N.D.    | 1.1E+00 | 1.8E+01 | N.D.    | 3.8E-02 | 2.1E-02 |

|                        | Start Date | End Date   | days | Latitude | Longitude | ng L <sup>-1</sup> |         |         |         |         |         |         |
|------------------------|------------|------------|------|----------|-----------|--------------------|---------|---------|---------|---------|---------|---------|
|                        |            |            |      |          |           | TBP                | TCEP    | TCPP    | TDCPP   | TPhP    | EHDPP   | TEHP    |
| V7_Bot                 | 2021-08-10 | 2021-09-01 | 22   | 48.4275  | -123.3714 | N.D.               | N.D.    | N.D.    | N.D.    | N.D.    | 2.8E-02 | 1.6E-02 |
| V8_Top                 | 2021-08-10 | 2021-09-01 | 22   | 48.4231  | -123.3712 | N.D.               | N.D.    | 2.0E+01 | N.D.    | 4.7E-01 | 5.6E-02 | 1.4E-02 |
| V8_Mid                 | 2021-08-10 | 2021-09-21 | 22   | 48.4231  | -123.3712 | N.D.               | N.D.    | 2.1E+00 | 1.3E+01 | 2.8E-01 | 4.4E-02 | 2.8E-02 |
| V8_Bot                 | 2021-08-10 | 2021-09-01 | 22   | 48.4231  | -123.3712 | N.D.               | N.D.    | N.D.    | N.D.    | N.D.    | 3.8E-02 | 1.3E-02 |
| V9_Top                 | 2021-08-10 | 2021-09-01 | 22   | 48.4236  | -123.3850 | N.D.               | N.D.    | 1.8E+01 | N.D.    | 3.7E-01 | 3.2E-02 | 1.1E-02 |
| V9_Mid                 | 2021-08-10 | 2021-09-01 | 22   | 48.4236  | -123.3850 | N.D.               | N.D.    | 5.3E+00 | 1.9E+01 | N.D.    | 3.0E-02 | 1.2E-02 |
| V9_Bot                 | 2021-08-10 | 2021-09-01 | 22   | 48.4236  | -123.3850 | N.D.               | 1.5E+02 | N.D.    | N.D.    | N.D.    | 4.0E-02 | 2.1E-02 |
| V10_Top                | 2021-08-10 | 2021-09-01 | 22   | 48.4386  | -123.4337 | 1.3E+01            | N.D.    | 1.1E+02 | N.D.    | N.D.    | 9.6E-03 | N.D.    |
| V10_Mid                | 2021-08-10 | 2021-09-01 | 22   | 48.4386  | -123.4337 | 9.2E+00            | N.D.    | 6.9E+01 | 1.8E+01 | N.D.    | 1.1E-02 | N.D.    |
| V10_Bot                | 2021-08-10 | 2021-09-01 | 22   | 48.4386  | -123.4337 | N.D.               | N.D.    | 6.3E+01 | N.D.    | N.D.    | 9.3E-03 | N.D.    |
| <b>Southern Quebec</b> |            |            |      |          |           |                    |         |         |         |         |         |         |
| W1                     | 2021-07-28 | 2021-08-24 | 27   | 45.5348  | -73.5277  | 2.5E+00            | N.D.    | N.D.    | N.D.    | N.D.    | 6.1E-03 | 7.4E-03 |
| W2                     | 2021-07-28 | 2021-08-24 | 27   | 45.5658  | -73.5091  | 4.0E+00            | 1.2E+02 | 1.5E+01 | N.D.    | N.D.    | 4.8E-03 | 2.0E-03 |
| W3                     | 2021-07-28 | 2021-08-24 | 27   | 45.7348  | -73.4171  | 1.3E+00            | N.D.    | N.D.    | 2.7E+01 | N.D.    | N.D.    | 4.0E-03 |
| W4                     | 2021-07-28 | 2021-08-24 | 27   | 45.7906  | -73.3447  | 5.8E+00            | 3.5E+02 | 1.5E+01 | 4.2E+01 | N.D.    | 1.0E-02 | 1.8E-03 |
| W5                     | 2021-07-28 | 2021-08-25 | 28   | 46.0413  | -73.1649  | 5.7E+00            | N.D.    | 4.5E-01 | 4.5E+01 | N.D.    | 4.4E-02 | 1.0E-02 |
| W6                     | 2021-07-29 | 2021-08-25 | 27   | 46.2436  | -72.7453  | 5.4E+00            | N.D.    | 4.3E+00 | 3.9E+01 | N.D.    | 1.0E-02 | 3.8E-03 |
| W7                     | 2021-07-29 | 2021-08-25 | 27   | 46.3789  | -72.4470  | 8.1E-01            | N.D.    | 4.7E+00 | N.D.    | N.D.    | 9.9E-03 | 4.8E-03 |
| W8                     | 2021-07-30 | 2021-08-27 | 28   | 46.8321  | -71.1717  | 6.0E+00            | N.D.    | N.D.    | N.D.    | N.D.    | N.D.    | 9.9E-03 |
| W9                     | 2021-07-30 | 2021-08-27 | 28   | 46.8442  | -71.1712  | 2.2E+00            | N.D.    | 1.1E+01 | N.D.    | N.D.    | 8.4E-03 | 5.8E-03 |
| W10_1                  | 2021-04-29 | 2021-05-31 | 32   | 48.5078  | -68.5178  | N.D.               | N.D.    | N.D.    | N.D.    | N.D.    | N.D.    | N.D.    |
| W10_2                  | 2021-04-29 | 2021-06-25 | 57   | 48.5078  | -68.5178  | N.D.               | N.D.    | 1.7E+00 | N.D.    | N.D.    | N.D.    | 2.5E-03 |
| W10_3                  | 2021-04-29 | 2021-07-08 | 70   | 48.5078  | -68.5178  | 2.6E+00            | N.D.    | N.D.    | N.D.    | N.D.    | N.D.    | N.D.    |
| <b>MDL</b>             |            |            |      |          |           | 6.0E-04            | 4.9E-03 | 4.7E-04 | 1.3E-02 | 7.5E-03 | 5.7E-04 | 1.1E-02 |

Note: N.D. denotes not detected. The site codes, 'V' and 'W' refer to locations in Southwestern BC and Southern Quebec, respectively. The numeric sequence following the letter represents the site and the number of replicated deployments. 'Top', 'Mid', and 'Bot' indicate sampling at the water surface, in the middle, and at the bottom, respectively. Site-specific sampling rates were calculated using the equation from by Booij and Smedes et al.(Booij et al., 2003; Booij and Smedes, 2010).



**Table S14** Water and air fugacity ratio ( $f_{W/A}$ ) of OPEs

| Sites | Water/ air fugacity ratio ( $f_{W/A}$ ) |          |          |          |          |
|-------|-----------------------------------------|----------|----------|----------|----------|
|       | TBP                                     | TCEP     | TCP      | TPhP     | EHDPP    |
| V1    | 1.58E-02                                |          |          |          | 1.63E-06 |
| V2    | 1.14E-01                                |          |          |          | 2.90E-05 |
| V3    |                                         |          |          |          | 9.46E-07 |
| V4    | 2.23E-04                                |          |          |          | 7.28E-06 |
| V5    | 4.96E-02                                |          |          |          | 9.23E-06 |
| V6    |                                         |          |          | 3.45E-05 | 1.00E-04 |
| V7    |                                         |          | 1.88E-03 |          | 5.32E-05 |
| V8    |                                         |          | 3.49E-02 | 3.23E-05 | 7.94E-05 |
| V9    |                                         |          | 3.23E-02 | 2.55E-05 | 4.54E-05 |
| V10   | 3.19E-01                                |          | 1.26E-01 |          | 3.33E-05 |
| W1    | 2.53E-03                                |          |          |          | 4.48E-06 |
| W2    | 4.08E-03                                | 8.50E-04 | 3.18E-03 |          | 3.55E-06 |
| W3    | 5.47E-03                                |          |          |          |          |
| W4    | 2.41E-02                                | 1.33E-02 | 1.23E-02 |          | 2.58E-05 |
| W5    | 1.43E-02                                |          | 1.76E-04 |          | 5.02E-05 |
| W6    | 1.29E-02                                |          | 2.47E-03 |          | 2.82E-05 |
| W7    | 3.35E-03                                |          | 1.27E-02 |          | 3.53E-06 |
| W8    | 2.13E-02                                |          |          |          |          |
| W9    | 7.92E-03                                |          | 6.64E-03 |          | 9.51E-06 |
| W10   |                                         |          |          |          |          |

Blank cells mean that data are unavailable. Average concentrations in water were used for replicates in fugacity calculations. Air concentrations for calculating fugacity were derived from PAS in the proximity to the PWS sites in similar season.

**Table S15** Long-range transport potential (LRTP) assessment for five OPEs

| Chemical name | Input parameters |               |               |                      |                        |                       | LRTP metrics $\Phi$ (%) |          |          |
|---------------|------------------|---------------|---------------|----------------------|------------------------|-----------------------|-------------------------|----------|----------|
|               | Molar Mass       | $\log K_{AW}$ | $\log K_{OW}$ | Half-life in air (h) | Half-life in water (h) | Half-life in soil (h) | $\Phi_1$                | $\Phi_2$ | $\Phi_3$ |
| TBP           | 266.3            | -4.88         | 3.65          | 4.88                 | 73.0                   | 146.1                 | 0.14                    | 0.01     | 2.14E-6  |
| TCEP          | 285.5            | -7.58         | 1.34          | 17.5                 | 932.9                  | 1865.8                | 0.29                    | 0.17     | 1.49E-3  |
| TCPP          | 327.6            | -5.99         | 2.54          | 17.5                 | 932.9                  | 1865.8                | 0.45                    | 0.10     | 4.62E-4  |
| TPhP          | 326.3            | -7.47         | 4.68          | 35.5                 | 431.8                  | 863.6                 | 1.71                    | 1.50     | 0.056    |
| EHDPP         | 362.4            | -5.72         | 6.16          | 9.66                 | 301.0                  | 601.9                 | 1.47                    | 0.49     | 0.054    |

The partition ratios for OPEs were obtained using the poly-parameter linear free energy relationships (ppLFERs) in the UFZ-LSER database (UFZ-LSER database v 3.2.1 [Internet], 2024). The environmental degradation half-lives were obtained from EAS-E Suite.(Anon, n.d.)

The maximum LRTP metrics  $\Phi_1$  were calculated using an emissions-fractions based LRTP screen tool (Breivik et al., 2022) under the scenario with 100% emissions to air.  $\Phi_1$ ,  $\Phi_2$  and  $\Phi_3$  represent the fraction reach a remote region, transferred to surface media in the remote region and accumulated in the remote region, respectively.

**Figure S1** Molecular structures of the organophosphate esters (OPEs) targeted in this study. The acronyms are defined in Table S1. Compounds for which labeled internal standards were used are given in bold font.

| <b>Detected OPEs</b> |           | <b>Non-detected OPEs</b>  |           |
|----------------------|-----------|---------------------------|-----------|
| Name                 | Structure | Name                      | Structure |
| <b>TEP</b>           |           | TEHP                      |           |
| <b>TPrP</b>          |           | ToTP                      |           |
| <b>TBP</b>           |           | TmTP                      |           |
| <b>TCEP</b>          |           | TPTP                      |           |
| <b>TCPP</b>          |           | T2IPP                     |           |
| <b>TDCPP</b>         |           | T35DMPP                   |           |
| <b>TPhP</b>          |           | TDBPP                     |           |
| <b>TBEP</b>          |           |                           |           |
| <b>EHDPP</b>         |           |                           |           |
|                      |           | <b>Injection Standard</b> |           |
|                      |           | Triamyl phosphate         |           |

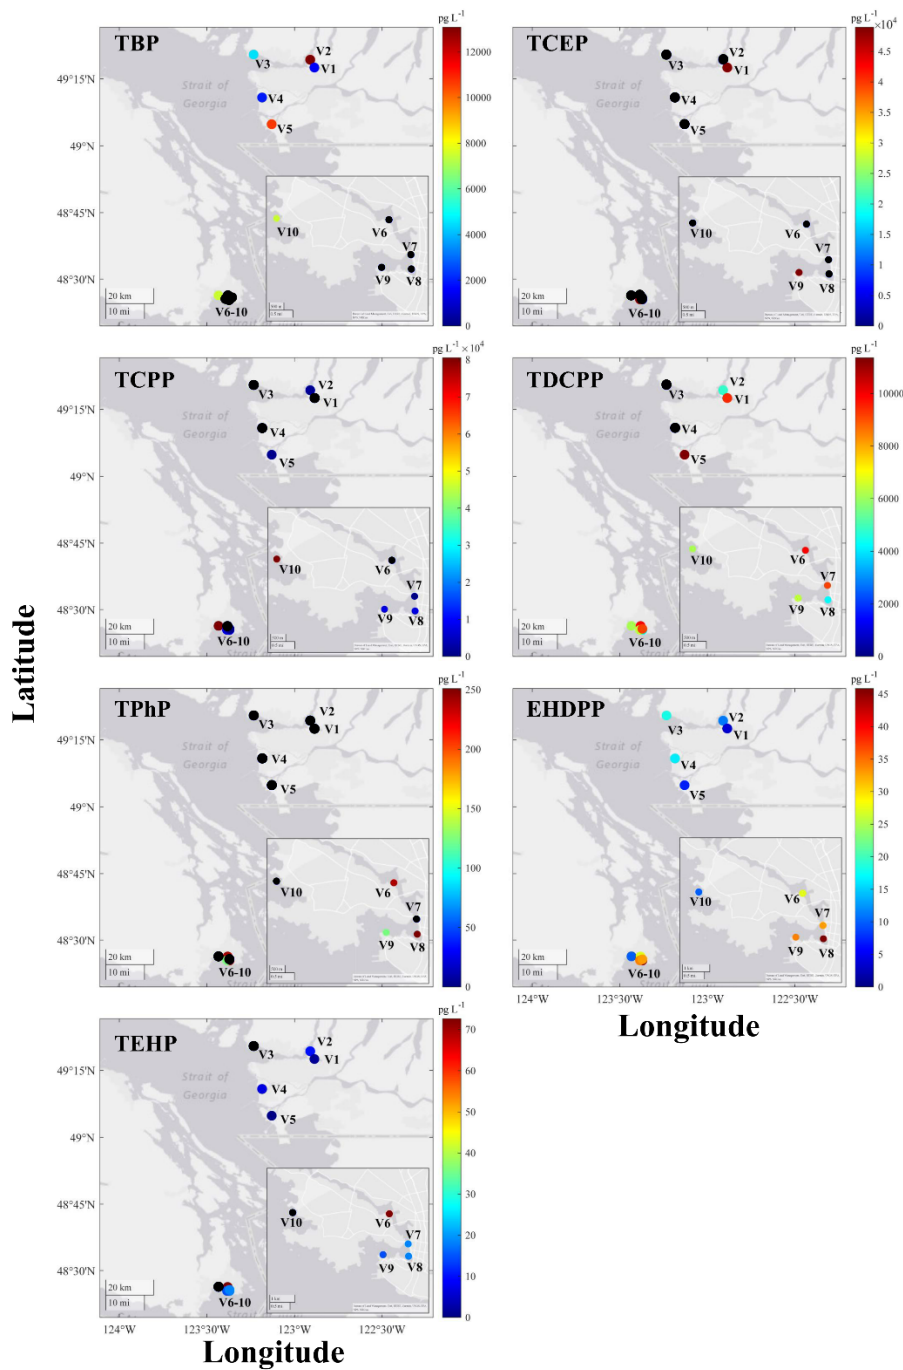

**Figure S2** Spatial patterns of OPEs in the water in Southwestern British Columbia (BC). The small inserted maps at the bottom right of each panel show the sampling sites located within Victoria. The concentration levels of the duplicated samples from the same site were averaged. Dark dots indicate that at these sites, OPEs were not detected. The maps were created using the basemap of MATLAB, copyrighted to Bureau of Land Management, Esri, HERE, Garmin, USGS, EPA, NPS, and NRCan.

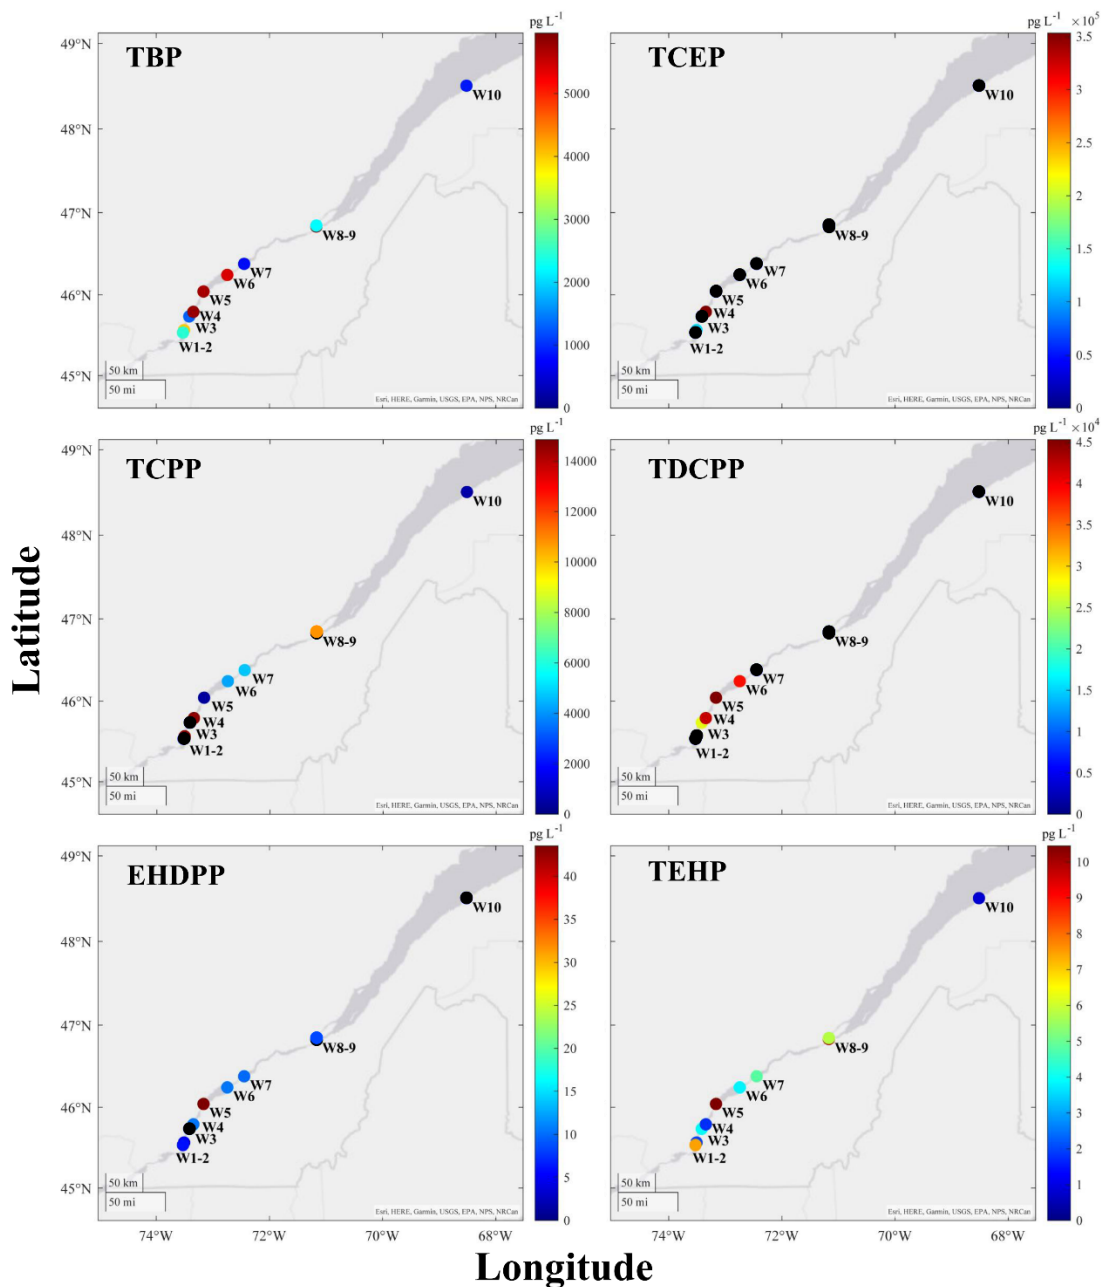

**Figure S3** Spatial patterns of OPEs in the water in Southwestern Quebec (QC). The concentration levels of the duplicated samples from the same site were averaged. Dark dots indicate that at these sites, OPEs were not detected. The maps were created using the basemap of MATLAB, copyrighted to Bureau of Land Management, Esri, HERE, Garmin, USGS, EPA, NPS, and NRCan.

## References

- Anon: EAS-E Suite (Ver.0.96 - BETA), <https://arnotresearch.com/eas-e-suite/>.
- Booij, K. and Smedes, F.: An Improved Method for Estimating in Situ Sampling Rates of Nonpolar Passive Samplers, *Environ. Sci. Technol.*, 44, 6789–6794, <https://doi.org/10.1021/es101321v>, 2010.
- Booij, K., Hofmans, H. E., Fischer, C. V, and Van Weerlee, E. M.: Temperature-Dependent Uptake Rates of Nonpolar Organic Compounds by Semipermeable Membrane Devices and Low-Density Polyethylene Membranes, *Environ. Sci. Technol.*, 37, 361–366, <https://doi.org/10.1021/es025739i>, 2003.
- Breivik, K., McLachlan, M. S., and Wania, F.: The Emissions Fractions Approach to Assessing the Long-Range Transport Potential of Organic Chemicals, *Environ. Sci. Technol.*, 56, 11983–11990, <https://doi.org/10.1021/acs.est.2c03047>, 2022.
- Kim, H.-K., Shin, Y.-S., Lee, D.-S., Song, B.-J., and Kim, J.-G.: Estimation of Rain Scavenging Ratio for Particle Bound Polycyclic Aromatic Hydrocarbons and Polychlorinated Biphenyls, <https://doi.org/10.4491/eer.2006.11.1.033>, 2006.
- Oh, J., Shunthirasingham, C., Lei, Y. D., Zhan, F., Li, Y., Dalpé Castilloux, A., Ben Chaaben, A., Lu, Z., Lee, K., Gobas, F. A. P. C., Eckhardt, S., Alexandrou, N., Hung, H., and Wania, F.: The atmospheric fate of 1,2-dibromo-4-(1,2-dibromoethyl)cyclohexane (TBECH): spatial patterns, seasonal variability, and deposition to Canadian coastal regions, *Atmos. Chem. Phys.*, 23, 10191–10205, <https://doi.org/10.5194/acp-23-10191-2023>, 2023.
- UFZ-LSER database v 3.2.1 [Internet]: <http://www.ufz.de/lserd>, last access: 13 January 2024.
